# Supplementary material for: A noninvasive and comprehensive method for continuous assessment of cerebral blood flow pulsation based on magnetic induction phase shift
Source: PeerJ. 2022 Feb 23;10:e13002. doi: 10.7717/peerj.13002 (PMC8881914; doi:10.7717/peerj.13002)
Supplement: Supplemental Information 1 [file peerj-10-13002-s001.xlsx]

## Sheet: Sheet1
	0ml/h	200ml/h	400ml/h	600ml/h	800ml/h	1000ml/h	1200ml/h	1400ml/h	1600ml/h	1800ml/h	2000ml/h
t(s)	MIPS(°)	MIPS(°)	MIPS(°)	MIPS(°)	MIPS(°)	MIPS(°)	MIPS(°)	MIPS(°)	MIPS(°)	MIPS(°)	MIPS(°)
0	110.532	110.887	111.056	111.311	111.403	111.544	111.695	111.803	111.987	111.975	112.138
0.025	110.531	110.888	111.056	111.311	111.403	111.546	111.692	111.804	111.983	111.969	112.135
0.05	110.531	110.887	111.055	111.314	111.403	111.546	111.694	111.802	111.985	111.97	112.136
0.075	110.53	110.888	111.053	111.311	111.403	111.547	111.694	111.804	111.986	111.972	112.133
0.1	110.532	110.888	111.055	111.311	111.403	111.544	111.694	111.803	111.986	111.974	112.13
0.125	110.531	110.886	111.055	111.313	111.404	111.544	111.69	111.805	111.984	111.974	112.135
0.15	110.532	110.889	111.055	111.313	111.404	111.543	111.695	111.803	111.987	111.972	112.133
0.175	110.531	110.885	111.055	111.311	111.4	111.543	111.694	111.805	111.986	111.974	112.136
0.2	110.532	110.888	111.057	111.311	111.405	111.545	111.694	111.804	111.984	111.972	112.135
0.225	110.529	110.888	111.055	111.313	111.404	111.54	111.694	111.804	111.98	111.972	112.133
0.25	110.529	110.888	111.058	111.314	111.404	111.541	111.698	111.805	111.981	111.973	112.133
0.275	110.532	110.888	111.055	111.312	111.401	111.54	111.697	111.802	111.981	111.974	112.137
0.3	110.533	110.888	111.054	111.312	111.405	111.542	111.697	111.803	111.98	111.975	112.137
0.325	110.529	110.889	111.056	111.313	111.403	111.542	111.696	111.802	111.982	111.972	112.135
0.35	110.531	110.887	111.055	111.312	111.404	111.54	111.697	111.798	111.983	111.974	112.138
0.375	110.529	110.886	111.055	111.314	111.403	111.54	111.696	111.8	111.982	111.974	112.136
0.4	110.531	110.888	111.057	111.311	111.404	111.541	111.696	111.8	111.983	111.975	112.137
0.425	110.529	110.885	111.057	111.313	111.403	111.54	111.695	111.802	111.983	111.973	112.135
0.45	110.529	110.888	111.055	111.311	111.405	111.543	111.698	111.799	111.982	111.974	112.135
0.475	110.531	110.887	111.055	111.314	111.403	111.542	111.698	111.798	111.981	111.975	112.135
0.5	110.529	110.888	111.056	111.311	111.4	111.542	111.7	111.802	111.984	111.974	112.135
0.525	110.528	110.888	111.055	111.313	111.399	111.544	111.698	111.8	111.985	111.973	112.138
0.55	110.529	110.885	111.05	111.312	111.4	111.541	111.698	111.801	111.983	111.969	112.132
0.575	110.529	110.887	111.052	111.31	111.4	111.543	111.699	111.799	111.984	111.969	112.135
0.6	110.528	110.888	111.049	111.314	111.4	111.543	111.695	111.802	111.984	111.971	112.133
0.625	110.528	110.887	111.051	111.31	111.399	111.542	111.695	111.8	111.984	111.971	112.135
0.65	110.531	110.887	111.052	111.314	111.4	111.543	111.699	111.802	111.984	111.971	112.135
0.675	110.528	110.887	111.05	111.314	111.4	111.544	111.699	111.802	111.984	111.971	112.133
0.7	110.528	110.888	111.053	111.309	111.4	111.544	111.698	111.802	111.984	111.971	112.136
0.725	110.531	110.886	111.05	111.31	111.401	111.543	111.697	111.801	111.983	111.972	112.133
0.75	110.528	110.886	111.05	111.308	111.403	111.546	111.698	111.803	111.983	111.972	112.136
0.775	110.528	110.886	111.051	111.306	111.402	111.543	111.698	111.803	111.983	111.972	112.133
0.8	110.529	110.885	111.049	111.311	111.402	111.542	111.695	111.801	111.986	111.972	112.135
0.825	110.531	110.888	111.052	111.309	111.401	111.543	111.695	111.804	111.981	111.974	112.135
0.85	110.528	110.885	111.049	111.311	111.402	111.543	111.694	111.802	111.978	111.974	112.138
0.875	110.529	110.888	111.051	111.309	111.4	111.546	111.695	111.803	111.979	111.975	112.136
0.9	110.528	110.886	111.051	111.309	111.4	111.545	111.692	111.802	111.979	111.973	112.135
0.925	110.528	110.888	111.052	111.309	111.404	111.545	111.695	111.805	111.98	111.973	112.136
0.95	110.528	110.885	111.052	111.311	111.403	111.543	111.694	111.802	111.981	111.972	112.138
0.975	110.529	110.887	111.05	111.311	111.402	111.547	111.695	111.803	111.981	111.973	112.139
1	110.526	110.887	111.053	111.308	111.404	111.544	111.695	111.802	111.98	111.972	112.135
1.025	110.529	110.889	111.052	111.31	111.403	111.544	111.695	111.8	111.98	111.972	112.135
1.05	110.528	110.885	111.053	111.309	111.404	111.542	111.697	111.8	111.981	111.972	112.134
1.075	110.528	110.885	111.052	111.309	111.403	111.544	111.696	111.797	111.983	111.969	112.135
1.1	110.528	110.888	111.054	111.31	111.402	111.544	111.696	111.797	111.981	111.969	112.135
1.125	110.527	110.887	111.052	111.311	111.403	111.541	111.695	111.799	111.982	111.97	112.136
1.15	110.528	110.886	111.052	111.309	111.403	111.546	111.696	111.8	111.983	111.971	112.138
1.175	110.529	110.889	111.053	111.311	111.404	111.544	111.696	111.799	111.983	111.972	112.136
1.2	110.528	110.885	111.051	111.309	111.403	111.542	111.697	111.8	111.983	111.971	112.138
1.225	110.527	110.886	111.052	111.311	111.404	111.537	111.698	111.802	111.984	111.969	112.135
1.25	110.528	110.887	111.053	111.311	111.403	111.538	111.696	111.802	111.981	111.971	112.136
1.275	110.528	110.886	111.055	111.309	111.406	111.54	111.698	111.799	111.984	111.967	112.133
1.3	110.525	110.888	111.053	111.311	111.402	111.54	111.698	111.802	111.982	111.972	112.138
1.325	110.526	110.886	111.053	111.311	111.405	111.54	111.697	111.8	111.984	111.97	112.138
1.35	110.526	110.888	111.051	111.311	111.403	111.538	111.699	111.8	111.987	111.972	112.138
1.375	110.528	110.885	111.053	111.312	111.404	111.541	111.697	111.803	111.986	111.974	112.138
1.4	110.528	110.885	111.052	111.312	111.404	111.537	111.698	111.804	111.984	111.971	112.138
1.425	110.526	110.887	111.053	111.313	111.404	111.538	111.701	111.802	111.986	111.972	112.137
1.45	110.528	110.886	111.053	111.311	111.406	111.54	111.697	111.802	111.986	111.971	112.136
1.475	110.526	110.885	111.054	111.311	111.403	111.539	111.696	111.804	111.98	111.974	112.134
1.5	110.527	110.888	111.053	111.312	111.405	111.542	111.698	111.802	111.981	111.974	112.133
1.525	110.528	110.887	111.055	111.311	111.404	111.54	111.697	111.802	111.98	111.974	112.133
1.55	110.525	110.884	111.05	111.311	111.406	111.541	111.698	111.805	111.981	111.972	112.135
1.575	110.528	110.886	111.055	111.312	111.404	111.541	111.692	111.803	111.981	111.973	112.136
1.6	110.52	110.884	111.055	111.312	111.408	111.538	111.692	111.805	111.984	111.973	112.137
1.625	110.526	110.887	111.053	111.312	111.406	111.54	111.694	111.804	111.981	111.966	112.136
1.65	110.525	110.884	111.055	111.31	111.405	111.541	111.691	111.803	111.984	111.97	112.136
1.675	110.525	110.885	111.055	111.311	111.404	111.542	111.692	111.801	111.981	111.971	112.137
1.7	110.526	110.886	111.056	111.312	111.406	111.541	111.692	111.799	111.984	111.972	112.135
1.725	110.525	110.885	111.052	111.312	111.406	111.54	111.694	111.798	111.983	111.972	112.138
1.75	110.526	110.886	111.054	111.312	111.404	111.54	111.694	111.8	111.985	111.972	112.135
1.775	110.527	110.885	111.055	111.311	111.401	111.543	111.695	111.799	111.984	111.97	112.137
1.8	110.526	110.887	111.053	111.311	111.403	111.54	111.693	111.8	111.984	111.972	112.139
1.825	110.528	110.885	111.055	111.314	111.403	111.54	111.695	111.8	111.984	111.973	112.136
1.85	110.526	110.885	111.055	111.311	111.4	111.541	111.695	111.8	111.985	111.972	112.136
1.875	110.525	110.886	111.053	111.314	111.402	111.544	111.695	111.799	111.984	111.97	112.136
1.9	110.526	110.884	111.054	111.311	111.403	111.542	111.695	111.8	111.984	111.974	112.138
1.925	110.523	110.886	111.055	111.311	111.401	111.541	111.696	111.802	111.984	111.973	112.135
1.95	110.525	110.886	111.057	111.314	111.397	111.541	111.697	111.798	111.984	111.972	112.134
1.975	110.526	110.886	111.051	111.311	111.403	111.543	111.698	111.8	111.986	111.972	112.132
2	110.526	110.887	111.055	111.314	111.403	111.54	111.696	111.799	111.984	111.974	112.136
2.025	110.524	110.888	111.053	111.311	111.403	111.542	111.695	111.802	111.984	111.974	112.135
2.05	110.525	110.885	111.053	111.312	111.402	111.54	111.695	111.8	111.984	111.973	112.136
2.075	110.525	110.888	111.055	111.312	111.404	111.542	111.697	111.8	111.986	111.974	112.134
2.1	110.526	110.887	111.056	111.311	111.404	111.543	111.698	111.802	111.981	111.974	112.136
2.125	110.526	110.885	111.053	111.312	111.403	111.541	111.696	111.802	111.981	111.972	112.135
2.15	110.525	110.886	111.055	111.311	111.402	111.542	111.697	111.801	111.981	111.969	112.136
2.175	110.526	110.888	111.053	111.312	111.405	111.543	111.698	111.803	111.983	111.969	112.136
2.2	110.525	110.888	111.056	111.312	111.404	111.544	111.698	111.802	111.983	111.968	112.135
2.225	110.525	110.883	111.055	111.311	111.406	111.536	111.698	111.801	111.983	111.971	112.138
2.25	110.527	110.886	111.052	111.313	111.404	111.536	111.695	111.803	111.982	111.971	112.136
2.275	110.524	110.885	111.056	111.314	111.404	111.536	111.698	111.803	111.983	111.969	112.139
2.3	110.525	110.886	111.054	111.311	111.406	111.537	111.698	111.802	111.984	111.97	112.136
2.325	110.525	110.885	111.057	111.308	111.404	111.537	111.699	111.803	111.983	111.969	112.135
2.35	110.526	110.886	111.055	111.309	111.406	111.537	111.7	111.803	111.984	111.969	112.138
2.375	110.525	110.886	111.055	111.308	111.404	111.537	111.693	111.797	111.982	111.971	112.135
2.4	110.525	110.885	111.055	111.306	111.404	111.54	111.692	111.799	111.984	111.969	112.135
2.425	110.525	110.886	111.055	111.306	111.406	111.538	111.692	111.799	111.984	111.972	112.134
2.45	110.525	110.887	111.053	111.308	111.406	111.538	111.693	111.797	111.985	111.971	112.132
2.475	110.524	110.886	111.055	111.306	111.406	111.537	111.694	111.799	111.984	111.971	112.135
2.5	110.526	110.886	111.053	111.308	111.403	111.54	111.692	111.8	111.987	111.971	112.135
2.525	110.528	110.885	111.057	111.309	111.404	111.538	111.695	111.799	111.987	111.971	112.137
2.55	110.528	110.885	111.055	111.309	111.406	111.538	111.692	111.798	111.985	111.972	112.135
2.575	110.523	110.882	111.052	111.307	111.403	111.538	111.694	111.799	111.987	111.968	112.139
2.6	110.526	110.886	111.053	111.31	111.405	111.54	111.696	111.798	111.985	111.969	112.137
2.625	110.523	110.885	111.057	111.31	111.406	111.54	111.695	111.8	111.986	111.972	112.136
2.65	110.525	110.885	111.053	111.312	111.404	111.539	111.695	111.802	111.985	111.973	112.138
2.675	110.524	110.885	111.055	111.311	111.407	111.538	111.695	111.801	111.987	111.969	112.135
2.7	110.525	110.883	111.055	111.309	111.403	111.542	111.697	111.799	111.984	111.966	112.141
2.725	110.526	110.885	111.056	111.311	111.406	111.538	111.697	111.801	111.985	111.968	112.138
2.75	110.524	110.886	111.055	111.311	111.405	111.538	111.695	111.801	111.98	111.969	112.138
2.775	110.526	110.886	111.055	111.312	111.404	111.541	111.697	111.802	111.985	111.966	112.138
2.8	110.524	110.886	111.054	111.31	111.407	111.54	111.698	111.802	111.981	111.969	112.136
2.825	110.525	110.885	111.053	111.312	111.406	111.541	111.697	111.801	111.983	111.968	112.136
2.85	110.525	110.886	111.055	111.311	111.406	111.54	111.696	111.801	111.986	111.967	112.138
2.875	110.524	110.885	111.052	111.311	111.406	111.54	111.696	111.802	111.984	111.968	112.135
2.9	110.525	110.884	111.055	111.312	111.404	111.541	111.696	111.8	111.984	111.967	112.135
2.925	110.526	110.886	111.055	111.312	111.406	111.541	111.696	111.803	111.985	111.967	112.137
2.95	110.523	110.885	111.055	111.311	111.403	111.54	111.7	111.799	111.984	111.968	112.137
2.975	110.525	110.883	111.055	111.314	111.407	111.54	111.698	111.802	111.984	111.971	112.135
3	110.525	110.884	111.056	111.312	111.406	111.541	111.698	111.8	111.986	111.968	112.135
3.025	110.524	110.885	111.053	111.311	111.403	111.54	111.698	111.802	111.984	111.97	112.135
3.05	110.527	110.886	111.053	111.314	111.403	111.54	111.699	111.796	111.987	111.969	112.138
3.075	110.523	110.883	111.049	111.315	111.402	111.541	111.699	111.796	111.983	111.968	112.135
3.1	110.526	110.885	111.05	111.311	111.4	111.541	111.698	111.798	111.987	111.966	112.136
3.125	110.525	110.885	111.05	111.313	111.4	111.54	111.698	111.795	111.984	111.971	112.137
3.15	110.526	110.886	111.049	111.314	111.399	111.542	111.698	111.801	111.986	111.969	112.138
3.175	110.524	110.885	111.052	111.314	111.401	111.538	111.695	111.796	111.986	111.968	112.138
3.2	110.526	110.884	111.049	111.312	111.4	111.542	111.695	111.795	111.984	111.965	112.137
3.225	110.525	110.885	111.05	111.313	111.399	111.537	111.693	111.8	111.99	111.966	112.137
3.25	110.525	110.883	111.049	111.314	111.403	111.537	111.692	111.799	111.983	111.966	112.139
3.275	110.524	110.885	111.049	111.312	111.4	111.537	111.694	111.799	111.988	111.964	112.139
3.3	110.527	110.884	111.051	111.314	111.403	111.535	111.695	111.797	111.986	111.967	112.138
3.325	110.525	110.885	111.05	111.314	111.401	111.535	111.695	111.799	111.986	111.969	112.139
3.35	110.525	110.882	111.049	111.314	111.401	111.537	111.695	111.798	111.984	111.968	112.132
3.375	110.523	110.882	111.049	111.314	111.403	111.536	111.695	111.799	111.983	111.969	112.134
3.4	110.525	110.885	111.052	111.314	111.4	111.537	111.696	111.798	111.983	111.966	112.134
3.425	110.525	110.884	111.052	111.312	111.401	111.537	111.695	111.798	111.98	111.966	112.137
3.45	110.525	110.885	111.049	111.314	111.402	111.54	111.695	111.802	111.983	111.968	112.133
3.475	110.526	110.883	111.05	111.317	111.403	111.538	111.695	111.801	111.984	111.969	112.135
3.5	110.525	110.885	111.049	111.314	111.401	111.537	111.694	111.799	111.983	111.968	112.135
3.525	110.525	110.885	111.051	111.317	111.403	111.538	111.695	111.8	111.984	111.97	112.136
3.55	110.525	110.882	111.053	111.312	111.405	111.539	111.698	111.801	111.984	111.968	112.133
3.575	110.525	110.883	111.049	111.317	111.403	111.537	111.697	111.802	111.982	111.971	112.137
3.6	110.526	110.883	111.053	111.315	111.404	111.539	111.698	111.801	111.983	111.969	112.135
3.625	110.525	110.885	111.049	111.315	111.404	111.538	111.697	111.802	111.984	111.969	112.138
3.65	110.525	110.884	111.05	111.316	111.403	111.538	111.694	111.802	111.983	111.969	112.139
3.675	110.525	110.883	111.051	111.315	111.404	111.539	111.699	111.801	111.984	111.971	112.138
3.7	110.525	110.885	111.05	111.317	111.404	111.54	111.697	111.799	111.984	111.969	112.136
3.725	110.525	110.883	111.049	111.315	111.403	111.54	111.698	111.799	111.986	111.968	112.138
3.75	110.523	110.883	111.054	111.314	111.403	111.541	111.697	111.795	111.986	111.964	112.138
3.775	110.523	110.882	111.051	111.315	111.404	111.538	111.696	111.796	111.983	111.966	112.137
3.8	110.522	110.882	111.052	111.317	111.404	111.539	111.697	111.796	111.986	111.965	112.138
3.825	110.525	110.885	111.051	111.316	111.403	111.54	111.698	111.796	111.983	111.966	112.132
3.85	110.524	110.885	111.052	111.314	111.405	111.538	111.697	111.796	111.987	111.968	112.135
3.875	110.525	110.884	111.052	111.314	111.403	111.541	111.698	111.796	111.984	111.969	112.135
3.9	110.521	110.886	111.051	111.316	111.405	111.54	111.7	111.796	111.984	111.966	112.136
3.925	110.522	110.885	111.05	111.314	111.402	111.539	111.697	111.799	111.983	111.968	112.135
3.95	110.522	110.886	111.05	111.314	111.403	111.539	111.701	111.796	111.984	111.967	112.133
3.975	110.522	110.885	111.052	111.311	111.405	111.542	111.69	111.8	111.984	111.966	112.136
4	110.522	110.885	111.05	111.313	111.403	111.54	111.694	111.799	111.979	111.968	112.135
4.025	110.523	110.885	111.05	111.312	111.405	111.542	111.693	111.798	111.981	111.967	112.132
4.05	110.523	110.883	111.052	111.311	111.403	111.54	111.694	111.799	111.98	111.969	112.136
4.075	110.523	110.885	111.053	111.312	111.404	111.54	111.694	111.797	111.981	111.969	112.137
4.1	110.523	110.885	111.05	111.313	111.403	111.54	111.693	111.8	111.981	111.97	112.138
4.125	110.523	110.886	111.053	111.312	111.404	111.541	111.695	111.8	111.982	111.969	112.136
4.15	110.523	110.886	111.05	111.314	111.403	111.541	111.693	111.8	111.98	111.966	112.133
4.175	110.52	110.882	111.054	111.311	111.406	111.543	111.695	111.799	111.983	111.969	112.136
4.2	110.525	110.882	111.052	111.314	111.403	111.541	111.697	111.799	111.981	111.969	112.136
4.225	110.524	110.877	111.053	111.315	111.405	111.538	111.694	111.8	111.984	111.971	112.135
4.25	110.524	110.882	111.053	111.311	111.403	111.535	111.695	111.799	111.983	111.97	112.136
4.275	110.522	110.879	111.051	111.314	111.406	111.535	111.696	111.799	111.979	111.963	112.133
4.3	110.521	110.882	111.054	111.311	111.406	111.537	111.694	111.8	111.983	111.965	112.129
4.325	110.523	110.878	111.052	111.311	111.398	111.537	111.696	111.799	111.981	111.966	112.131
4.35	110.52	110.879	111.052	111.312	111.401	111.535	111.695	111.8	111.981	111.966	112.135
4.375	110.522	110.882	111.052	111.313	111.398	111.535	111.695	111.798	111.981	111.966	112.135
4.4	110.521	110.879	111.053	111.312	111.4	111.534	111.698	111.799	111.981	111.968	112.135
4.425	110.523	110.879	111.052	111.314	111.4	111.536	111.696	111.796	111.981	111.966	112.134
4.45	110.522	110.88	111.053	111.313	111.4	111.538	111.695	111.796	111.982	111.965	112.132
4.475	110.522	110.88	111.052	111.314	111.398	111.537	111.696	111.797	111.984	111.966	112.135
4.5	110.521	110.882	111.052	111.314	111.4	111.538	111.695	111.797	111.981	111.968	112.133
4.525	110.525	110.88	111.054	111.314	111.399	111.541	111.696	111.797	111.983	111.964	112.133
4.55	110.521	110.882	111.052	111.316	111.4	111.537	111.698	111.797	111.983	111.969	112.138
4.575	110.522	110.882	111.055	111.315	111.399	111.54	111.698	111.797	111.981	111.967	112.135
4.6	110.522	110.88	111.055	111.317	111.4	111.536	111.698	111.798	111.984	111.967	112.136
4.625	110.522	110.882	111.056	111.315	111.399	111.536	111.701	111.796	111.979	111.968	112.136
4.65	110.523	110.88	111.055	111.315	111.4	111.538	111.698	111.797	111.978	111.969	112.132
4.675	110.52	110.881	111.053	111.316	111.398	111.538	111.699	111.799	111.98	111.969	112.135
4.7	110.522	110.879	111.055	111.317	111.4	111.537	111.697	111.796	111.977	111.967	112.133
4.725	110.519	110.882	111.053	111.317	111.401	111.537	111.699	111.801	111.978	111.966	112.136
4.75	110.522	110.88	111.055	111.314	111.4	111.538	111.697	111.797	111.978	111.968	112.129
4.775	110.522	110.878	111.053	111.315	111.4	111.54	111.692	111.8	111.98	111.966	112.132
4.8	110.522	110.881	111.053	111.316	111.4	111.538	111.695	111.799	111.981	111.961	112.133
4.825	110.522	110.879	111.055	111.316	111.401	111.538	111.692	111.8	111.981	111.965	112.135
4.85	110.523	110.883	111.057	111.316	111.401	111.538	111.696	111.799	111.979	111.963	112.133
4.875	110.52	110.882	111.055	111.315	111.4	111.54	111.695	111.797	111.978	111.965	112.133
4.9	110.522	110.88	111.057	111.315	111.402	111.541	111.695	111.796	111.982	111.966	112.135
4.925	110.522	110.881	111.055	111.314	111.401	111.541	111.697	111.799	111.981	111.965	112.134
4.95	110.521	110.88	111.055	111.317	111.4	111.54	111.695	111.8	111.98	111.966	112.134
4.975	110.522	110.88	111.056	111.319	111.401	111.54	111.697	111.799	111.98	111.965	112.132
5	110.521	110.88	111.056	111.318	111.4	111.538	111.697	111.796	111.981	111.965	112.135
5.025	110.522	110.882	111.058	111.318	111.401	111.54	111.695	111.801	111.978	111.966	112.136
5.05	110.522	110.882	111.057	111.319	111.4	111.541	111.699	111.799	111.981	111.965	112.136
5.075	110.519	110.88	111.058	111.317	111.4	111.54	111.697	111.797	111.98	111.968	112.136
5.1	110.52	110.882	111.055	111.317	111.4	111.543	111.698	111.796	111.982	111.966	112.134
5.125	110.52	110.88	111.058	111.318	111.401	111.539	111.696	111.795	111.981	111.966	112.135
5.15	110.522	110.88	111.055	111.319	111.4	111.54	111.7	111.796	111.98	111.966	112.136
5.175	110.519	110.882	111.053	111.319	111.4	111.54	111.698	111.794	111.982	111.967	112.136
5.2	110.522	110.88	111.056	111.318	111.4	111.54	111.697	111.796	111.98	111.969	112.134
5.225	110.522	110.882	111.056	111.318	111.401	111.54	111.699	111.796	111.981	111.966	112.13
5.25	110.522	110.881	111.058	111.319	111.4	111.536	111.698	111.796	111.98	111.966	112.132
5.275	110.521	110.882	111.057	111.319	111.398	111.535	111.7	111.797	111.975	111.968	112.132
5.3	110.519	110.88	111.058	111.322	111.402	111.537	111.7	111.799	111.978	111.963	112.133
5.325	110.519	110.88	111.058	111.32	111.4	111.535	111.7	111.8	111.977	111.963	112.135
5.35	110.523	110.882	111.058	111.319	111.4	111.537	111.701	111.798	111.977	111.963	112.134
5.375	110.521	110.88	111.057	111.319	111.4	111.535	111.698	111.799	111.978	111.96	112.134
5.4	110.523	110.88	111.058	111.322	111.4	111.535	111.698	111.798	111.98	111.965	112.135
5.425	110.522	110.881	111.057	111.319	111.4	111.534	111.7	111.798	111.978	111.964	112.136
5.45	110.522	110.879	111.058	111.32	111.401	111.537	111.698	111.799	111.981	111.963	112.136
5.475	110.522	110.879	111.058	111.32	111.399	111.538	111.699	111.799	111.979	111.965	112.135
5.5	110.526	110.88	111.059	111.32	111.403	111.535	111.698	111.793	111.979	111.961	112.134
5.525	110.522	110.882	111.058	111.319	111.4	111.538	111.7	111.8	111.979	111.965	112.135
5.55	110.522	110.879	111.06	111.317	111.398	111.539	111.702	111.799	111.98	111.965	112.138
5.575	110.522	110.881	111.058	111.316	111.4	111.538	111.694	111.8	111.978	111.963	112.135
5.6	110.523	110.882	111.059	111.317	111.398	111.538	111.695	111.799	111.981	111.964	112.135
5.625	110.522	110.88	111.058	111.317	111.396	111.537	111.695	111.799	111.982	111.963	112.136
5.65	110.521	110.881	111.056	111.315	111.397	111.538	111.695	111.801	111.983	111.965	112.136
5.675	110.519	110.882	111.054	111.316	111.397	111.538	111.693	111.797	111.982	111.966	112.132
5.7	110.522	110.882	111.055	111.316	111.396	111.538	111.695	111.799	111.981	111.966	112.131
5.725	110.52	110.882	111.055	111.316	111.397	111.54	111.694	111.802	111.981	111.966	112.132
5.75	110.52	110.879	111.053	111.317	111.395	111.54	111.694	111.796	111.984	111.966	112.133
5.775	110.52	110.882	111.054	111.316	111.394	111.539	111.696	111.795	111.981	111.966	112.135
5.8	110.522	110.883	111.053	111.317	111.395	111.538	111.693	111.797	111.981	111.966	112.134
5.825	110.522	110.88	111.055	111.318	111.397	111.538	111.695	111.793	111.983	111.963	112.135
5.85	110.52	110.881	111.051	111.317	111.394	111.539	111.697	111.795	111.98	111.96	112.13
5.875	110.52	110.88	111.055	111.317	111.397	111.54	111.697	111.796	111.981	111.96	112.135
5.9	110.519	110.882	111.055	111.32	111.397	111.54	111.695	111.796	111.979	111.961	112.132
5.925	110.519	110.882	111.055	111.318	111.397	111.54	111.696	111.798	111.978	111.964	112.135
5.95	110.521	110.88	111.054	111.317	111.397	111.54	111.698	111.798	111.976	111.966	112.134
5.975	110.521	110.882	111.056	111.317	111.397	111.541	111.698	111.797	111.978	111.962	112.134
6	110.521	110.882	111.055	111.317	111.396	111.539	111.697	111.796	111.978	111.96	112.135
6.025	110.521	110.882	111.055	111.317	111.396	111.54	111.695	111.796	111.98	111.963	112.135
6.05	110.522	110.881	111.057	111.319	111.397	111.54	111.696	111.796	111.98	111.963	112.137
6.075	110.522	110.882	111.056	111.317	111.395	111.541	111.697	111.797	111.977	111.96	112.134
6.1	110.52	110.882	111.053	111.32	111.397	111.541	111.695	111.796	111.98	111.963	112.132
6.125	110.521	110.882	111.055	111.318	111.395	111.54	111.698	111.798	111.98	111.965	112.133
6.15	110.521	110.882	111.056	111.317	111.396	111.54	111.697	111.796	111.981	111.963	112.131
6.175	110.522	110.881	111.054	111.317	111.399	111.539	111.699	111.797	111.978	111.963	112.129
6.2	110.522	110.88	111.055	111.32	111.397	111.54	111.698	111.797	111.978	111.963	112.131
6.225	110.522	110.879	111.056	111.318	111.397	111.54	111.698	111.796	111.98	111.964	112.133
6.25	110.522	110.879	111.058	111.32	111.397	111.534	111.696	111.799	111.98	111.964	112.132
6.275	110.52	110.88	111.056	111.32	111.395	111.535	111.7	111.797	111.98	111.963	112.133
6.3	110.522	110.88	111.055	111.319	111.397	111.534	111.697	111.798	111.981	111.965	112.133
6.325	110.52	110.882	111.055	111.319	111.397	111.534	111.699	111.798	111.981	111.965	112.135
6.35	110.519	110.882	111.058	111.317	111.396	111.537	111.697	111.799	111.98	111.965	112.133
6.375	110.522	110.882	111.055	111.32	111.398	111.535	111.692	111.797	111.983	111.96	112.135
6.4	110.518	110.882	111.056	111.319	111.397	111.537	111.694	111.799	111.979	111.962	112.135
6.425	110.519	110.879	111.056	111.319	111.4	111.535	111.694	111.796	111.983	111.962	112.135
6.45	110.519	110.882	111.056	111.318	111.398	111.538	111.692	111.794	111.98	111.963	112.135
6.475	110.522	110.877	111.055	111.32	111.398	111.538	111.696	111.795	111.982	111.963	112.134
6.5	110.52	110.882	111.058	111.319	111.398	111.537	111.695	111.796	111.981	111.964	112.136
6.525	110.521	110.879	111.056	111.317	111.397	111.538	111.697	111.794	111.978	111.96	112.135
6.55	110.522	110.879	111.056	111.321	111.4	111.539	111.695	111.797	111.976	111.962	112.135
6.575	110.522	110.88	111.055	111.32	111.398	111.54	111.697	111.796	111.978	111.963	112.132
6.6	110.519	110.879	111.056	111.319	111.396	111.538	111.694	111.796	111.977	111.963	112.136
6.625	110.519	110.882	111.053	111.317	111.399	111.538	111.697	111.795	111.978	111.963	112.13
6.65	110.519	110.88	111.056	111.32	111.398	111.538	111.697	111.795	111.978	111.963	112.132
6.675	110.521	110.88	111.053	111.317	111.398	111.537	111.695	111.796	111.975	111.965	112.131
6.7	110.522	110.882	111.056	111.317	111.4	111.538	111.697	111.796	111.978	111.962	112.132
6.725	110.52	110.881	111.055	111.32	111.399	111.538	111.698	111.797	111.978	111.964	112.134
6.75	110.522	110.882	111.058	111.32	111.397	111.539	111.697	111.796	111.98	111.963	112.134
6.775	110.519	110.881	111.056	111.319	111.395	111.538	111.697	111.795	111.979	111.964	112.132
6.8	110.522	110.88	111.057	111.321	111.399	111.537	111.698	111.797	111.982	111.963	112.131
6.825	110.518	110.882	111.055	111.32	111.4	111.54	111.698	111.796	111.977	111.963	112.132
6.85	110.52	110.88	111.055	111.321	111.398	111.538	111.698	111.796	111.98	111.963	112.133
6.875	110.52	110.88	111.056	111.317	111.397	111.538	111.699	111.797	111.981	111.964	112.133
6.9	110.522	110.883	111.054	111.318	111.393	111.537	111.695	111.799	111.983	111.962	112.133
6.925	110.519	110.882	111.055	111.319	111.395	111.541	111.7	111.799	111.981	111.959	112.135
6.95	110.52	110.883	111.055	111.32	111.397	111.54	111.701	111.796	111.981	111.96	112.136
6.975	110.52	110.884	111.054	111.317	111.394	111.54	111.7	111.797	111.981	111.96	112.132
7	110.519	110.882	111.055	111.32	111.393	111.54	111.7	111.798	111.981	111.962	112.133
7.025	110.519	110.883	111.056	111.317	111.394	111.54	111.699	111.796	111.981	111.963	112.135
7.05	110.517	110.882	111.056	111.32	111.394	111.538	111.698	111.799	111.981	111.958	112.133
7.075	110.52	110.883	111.053	111.322	111.394	111.54	111.698	111.796	111.983	111.96	112.133
7.1	110.517	110.881	111.052	111.32	111.397	111.54	111.699	111.794	111.981	111.96	112.129
7.125	110.521	110.883	111.054	111.322	111.395	111.537	111.699	111.796	111.982	111.962	112.131
7.15	110.519	110.881	111.055	111.316	111.396	111.537	111.697	111.792	111.978	111.96	112.131
7.175	110.519	110.882	111.056	111.315	111.395	111.54	111.695	111.794	111.978	111.96	112.131
7.2	110.519	110.883	111.052	111.316	111.396	111.538	111.694	111.796	111.978	111.963	112.134
7.225	110.519	110.882	111.057	111.312	111.397	111.54	111.693	111.794	111.98	111.965	112.135
7.25	110.519	110.883	111.055	111.317	111.395	111.534	111.691	111.793	111.978	111.962	112.132
7.275	110.517	110.883	111.055	111.314	111.395	111.535	111.695	111.796	111.98	111.963	112.133
7.3	110.519	110.884	111.052	111.314	111.394	111.534	111.695	111.795	111.976	111.963	112.132
7.325	110.516	110.885	111.055	111.314	111.395	111.534	111.695	111.793	111.977	111.961	112.133
7.35	110.518	110.882	111.055	111.315	111.396	111.534	111.697	111.796	111.98	111.96	112.134
7.375	110.519	110.883	111.054	111.314	111.396	111.535	111.698	111.795	111.978	111.963	112.135
7.4	110.52	110.882	111.052	111.314	111.394	111.535	111.695	111.795	111.979	111.96	112.133
7.425	110.516	110.883	111.055	111.317	111.395	111.534	111.697	111.795	111.979	111.959	112.136
7.45	110.519	110.885	111.056	111.314	111.394	111.537	111.695	111.796	111.982	111.957	112.134
7.475	110.52	110.883	111.052	111.316	111.394	111.538	111.697	111.799	111.979	111.958	112.136
7.5	110.519	110.883	111.055	111.316	111.396	111.535	111.698	111.796	111.98	111.957	112.137
7.525	110.519	110.882	111.053	111.316	111.394	111.537	111.697	111.796	111.981	111.958	112.133
7.55	110.517	110.885	111.056	111.316	111.397	111.539	111.697	111.799	111.982	111.961	112.132
7.575	110.52	110.882	111.055	111.316	111.396	111.537	111.699	111.798	111.981	111.961	112.129
7.6	110.518	110.883	111.055	111.316	111.396	111.537	111.696	111.797	111.981	111.959	112.13
7.625	110.517	110.885	111.053	111.316	111.394	111.538	111.698	111.796	111.981	111.959	112.132
7.65	110.519	110.883	111.056	111.317	111.397	111.537	111.698	111.8	111.982	111.963	112.132
7.675	110.519	110.884	111.055	111.314	111.395	111.537	111.698	111.797	111.98	111.96	112.13
7.7	110.519	110.885	111.056	111.318	111.397	111.538	111.699	111.796	111.981	111.96	112.133
7.725	110.519	110.882	111.055	111.317	111.397	111.539	111.699	111.799	111.979	111.96	112.132
7.75	110.518	110.883	111.055	111.316	111.397	111.54	111.698	111.796	111.983	111.962	112.133
7.775	110.519	110.883	111.052	111.317	111.394	111.537	111.701	111.793	111.973	111.961	112.132
7.8	110.519	110.884	111.054	111.317	111.396	111.54	111.703	111.796	111.978	111.961	112.131
7.825	110.519	110.885	111.052	111.318	111.397	111.538	111.697	111.792	111.977	111.962	112.135
7.85	110.519	110.884	111.056	111.317	111.397	111.538	111.701	111.794	111.978	111.962	112.135
7.875	110.518	110.883	111.053	111.317	111.397	111.54	111.7	111.794	111.978	111.962	112.133
7.9	110.52	110.885	111.055	111.319	111.397	111.54	111.698	111.794	111.978	111.962	112.135
7.925	110.519	110.885	111.055	111.319	111.397	111.54	111.701	111.794	111.978	111.963	112.133
7.95	110.519	110.885	111.056	111.317	111.397	111.539	111.698	111.795	111.978	111.96	112.133
7.975	110.519	110.885	111.055	111.317	111.398	111.541	111.695	111.793	111.978	111.957	112.133
8	110.52	110.884	111.055	111.317	111.396	111.54	111.696	111.796	111.98	111.959	112.133
8.025	110.519	110.883	111.055	111.32	111.397	111.54	111.695	111.793	111.977	111.959	112.129
8.05	110.52	110.883	111.058	111.318	111.394	111.54	111.695	111.792	111.975	111.959	112.129
8.075	110.519	110.885	111.054	111.32	111.398	111.538	111.695	111.796	111.978	111.961	112.131
8.1	110.52	110.881	111.055	111.318	111.399	111.542	111.695	111.794	111.982	111.957	112.132
8.125	110.52	110.885	111.054	111.317	111.397	111.54	111.697	111.797	111.977	111.961	112.134
8.15	110.519	110.885	111.055	111.32	111.394	111.54	111.694	111.795	111.98	111.959	112.131
8.175	110.52	110.885	111.057	111.317	111.389	111.541	111.695	111.799	111.98	111.96	112.132
8.2	110.519	110.882	111.056	111.319	111.394	111.54	111.695	111.797	111.98	111.961	112.133
8.225	110.519	110.885	111.056	111.319	111.392	111.539	111.695	111.796	111.98	111.963	112.13
8.25	110.519	110.885	111.054	111.32	111.394	111.537	111.697	111.797	111.978	111.963	112.132
8.275	110.519	110.885	111.051	111.317	111.391	111.536	111.696	111.797	111.978	111.963	112.131
8.3	110.519	110.885	111.052	111.32	111.392	111.537	111.697	111.795	111.981	111.961	112.132
8.325	110.519	110.884	111.052	111.319	111.39	111.534	111.697	111.797	111.98	111.962	112.135
8.35	110.52	110.885	111.053	111.319	111.392	111.537	111.695	111.797	111.978	111.963	112.133
8.375	110.519	110.885	111.051	111.32	111.392	111.534	111.696	111.796	111.981	111.963	112.134
8.4	110.517	110.885	111.052	111.317	111.392	111.537	111.698	111.797	111.974	111.963	112.132
8.425	110.521	110.884	111.049	111.32	111.394	111.537	111.698	111.797	111.976	111.963	112.133
8.45	110.519	110.885	111.054	111.318	111.389	111.539	111.7	111.794	111.976	111.963	112.132
8.475	110.52	110.885	111.051	111.321	111.393	111.537	111.697	111.793	111.974	111.964	112.135
8.5	110.519	110.886	111.049	111.319	111.392	111.539	111.699	111.792	111.977	111.96	112.129
8.525	110.521	110.884	111.053	111.32	111.394	111.537	111.698	111.793	111.975	111.96	112.13
8.55	110.52	110.883	111.052	111.32	111.394	111.54	111.698	111.793	111.975	111.962	112.13
8.575	110.52	110.883	111.053	111.32	111.392	111.538	111.7	111.794	111.975	111.96	112.127
8.6	110.519	110.884	111.05	111.321	111.394	111.54	111.697	111.793	111.975	111.962	112.132
8.625	110.521	110.885	111.053	111.32	111.393	111.537	111.697	111.796	111.977	111.961	112.131
8.65	110.52	110.882	111.051	111.32	111.391	111.537	111.701	111.796	111.975	111.962	112.132
8.675	110.519	110.883	111.054	111.322	111.395	111.54	111.696	111.794	111.977	111.96	112.13
8.7	110.52	110.885	111.052	111.319	111.393	111.539	111.698	111.795	111.975	111.962	112.131
8.725	110.52	110.883	111.053	111.321	111.394	111.541	111.696	111.796	111.977	111.961	112.132
8.75	110.521	110.887	111.053	111.317	111.396	111.534	111.694	111.794	111.975	111.965	112.131
8.775	110.519	110.883	111.053	111.316	111.394	111.54	111.695	111.796	111.977	111.96	112.133
8.8	110.519	110.885	111.053	111.317	111.396	111.54	111.694	111.794	111.977	111.962	112.132
8.825	110.52	110.885	111.055	111.314	111.394	111.54	111.693	111.795	111.978	111.962	112.132
8.85	110.519	110.882	111.053	111.319	111.396	111.54	111.692	111.796	111.977	111.965	112.133
8.875	110.521	110.885	111.054	111.318	111.394	111.538	111.695	111.794	111.978	111.963	112.133
8.9	110.519	110.883	111.054	111.316	111.395	111.537	111.695	111.797	111.977	111.963	112.134
8.925	110.518	110.886	111.053	111.316	111.395	111.54	111.696	111.796	111.978	111.962	112.133
8.95	110.52	110.884	111.054	111.317	111.395	111.538	111.697	111.797	111.975	111.963	112.133
8.975	110.521	110.884	111.054	111.317	111.394	111.539	111.695	111.795	111.977	111.963	112.129
9	110.519	110.885	111.053	111.317	111.394	111.541	111.696	111.797	111.978	111.965	112.129
9.025	110.519	110.885	111.053	111.317	111.394	111.542	111.696	111.796	111.972	111.957	112.13
9.05	110.522	110.885	111.055	111.317	111.394	111.54	111.694	111.797	111.972	111.96	112.133
9.075	110.522	110.885	111.052	111.321	111.399	111.536	111.696	111.798	111.971	111.963	112.131
9.1	110.519	110.885	111.055	111.32	111.394	111.54	111.695	111.798	111.974	111.958	112.13
9.125	110.52	110.885	111.051	111.317	111.394	111.539	111.695	111.795	111.974	111.96	112.132
9.15	110.519	110.882	111.055	111.319	111.394	111.54	111.697	111.792	111.972	111.96	112.132
9.175	110.52	110.879	111.054	111.317	111.396	111.54	111.697	111.793	111.972	111.963	112.133
9.2	110.519	110.879	111.052	111.317	111.394	111.54	111.695	111.795	111.975	111.961	112.131
9.225	110.52	110.882	111.052	111.319	111.397	111.539	111.697	111.793	111.972	111.962	112.133
9.25	110.52	110.88	111.055	111.319	111.395	111.534	111.696	111.796	111.975	111.962	112.132
9.275	110.519	110.88	111.053	111.319	111.396	111.535	111.697	111.793	111.973	111.963	112.134
9.3	110.519	110.879	111.055	111.32	111.394	111.534	111.698	111.795	111.975	111.966	112.132
9.325	110.519	110.879	111.053	111.322	111.396	111.534	111.698	111.796	111.972	111.96	112.135
9.35	110.519	110.88	111.053	111.32	111.394	111.534	111.698	111.796	111.977	111.962	112.132
9.375	110.519	110.88	111.055	111.319	111.395	111.536	111.7	111.797	111.974	111.965	112.132
9.4	110.518	110.879	111.053	111.32	111.396	111.532	111.7	111.796	111.976	111.961	112.131
9.425	110.519	110.877	111.052	111.321	111.397	111.539	111.698	111.796	111.977	111.966	112.133
9.45	110.519	110.88	111.053	111.32	111.392	111.535	111.698	111.796	111.976	111.963	112.129
9.475	110.52	110.88	111.053	111.319	111.389	111.537	111.697	111.795	111.972	111.963	112.127
9.5	110.518	110.88	111.054	111.32	111.391	111.532	111.698	111.794	111.977	111.963	112.129
9.525	110.517	110.882	111.053	111.322	111.391	111.537	111.695	111.795	111.977	111.965	112.129
9.55	110.518	110.879	111.056	111.319	111.392	111.537	111.692	111.794	111.977	111.963	112.132
9.575	110.518	110.878	111.056	111.319	111.392	111.538	111.692	111.797	111.977	111.961	112.129
9.6	110.519	110.882	111.055	111.322	111.391	111.537	111.694	111.796	111.975	111.96	112.129
9.625	110.519	110.88	111.054	111.32	111.392	111.537	111.693	111.797	111.977	111.962	112.13
9.65	110.518	110.882	111.052	111.32	111.392	111.537	111.691	111.799	111.975	111.961	112.129
9.675	110.519	110.879	111.055	111.322	111.394	111.534	111.695	111.796	111.972	111.962	112.132
9.7	110.519	110.879	111.052	111.32	111.391	111.537	111.694	111.798	111.974	111.96	112.131
9.725	110.517	110.882	111.056	111.323	111.394	111.539	111.695	111.796	111.971	111.962	112.133
9.75	110.517	110.882	111.056	111.321	111.392	111.539	111.695	111.796	111.973	111.963	112.132
9.775	110.516	110.879	111.052	111.321	111.392	111.536	111.695	111.797	111.975	111.962	112.13
9.8	110.519	110.88	111.053	111.322	111.394	111.539	111.696	111.797	111.973	111.963	112.132
9.825	110.516	110.881	111.056	111.322	111.391	111.537	111.696	111.793	111.972	111.963	112.131
9.85	110.519	110.88	111.054	111.322	111.393	111.538	111.695	111.793	111.975	111.963	112.131
9.875	110.517	110.88	111.055	111.322	111.394	111.538	111.695	111.793	111.973	111.965	112.13
9.9	110.517	110.879	111.055	111.322	111.396	111.538	111.695	111.789	111.976	111.963	112.131
9.925	110.516	110.879	111.055	111.323	111.392	111.54	111.695	111.795	111.973	111.963	112.128
9.95	110.519	110.879	111.054	111.322	111.394	111.538	111.699	111.794	111.975	111.963	112.128
9.975	110.518	110.878	111.055	111.322	111.394	111.54	111.698	111.794	111.974	111.962	112.129
10	110.517	110.881	111.053	111.321	111.395	111.54	111.693	111.794	111.975	111.966	112.129
10.025	110.518	110.88	111.056	111.322	111.394	111.543	111.698	111.793	111.977	111.963	112.13
10.05	110.516	110.88	111.055	111.325	111.395	111.538	111.698	111.795	111.975	111.963	112.13
10.075	110.521	110.882	111.056	111.322	111.392	111.538	111.693	111.792	111.976	111.964	112.132
10.1	110.517	110.88	111.055	111.324	111.396	111.54	111.7	111.793	111.974	111.958	112.13
10.125	110.517	110.88	111.055	111.322	111.393	111.54	111.696	111.794	111.978	111.961	112.129
10.15	110.517	110.88	111.054	111.323	111.395	111.54	111.698	111.796	111.975	111.961	112.13
10.175	110.519	110.88	111.056	111.324	111.394	111.542	111.696	111.795	111.975	111.96	112.133
10.2	110.518	110.88	111.054	111.323	111.395	111.539	111.695	111.796	111.974	111.962	112.131
10.225	110.519	110.879	111.056	111.323	111.395	111.541	111.697	111.794	111.975	111.96	112.131
10.25	110.517	110.882	111.056	111.322	111.397	111.534	111.698	111.796	111.977	111.962	112.133
10.275	110.519	110.88	111.055	111.323	111.395	111.534	111.698	111.795	111.972	111.963	112.132
10.3	110.519	110.882	111.056	111.323	111.397	111.535	111.698	111.797	111.971	111.962	112.132
10.325	110.519	110.88	111.055	111.323	111.397	111.535	111.693	111.798	111.972	111.963	112.133
10.35	110.519	110.88	111.057	111.325	111.395	111.536	111.694	111.796	111.972	111.963	112.131
10.375	110.516	110.883	111.055	111.32	111.395	111.536	111.692	111.796	111.974	111.964	112.13
10.4	110.52	110.88	111.056	111.319	111.397	111.534	111.694	111.796	111.974	111.963	112.127
10.425	110.519	110.882	111.056	111.32	111.397	111.536	111.692	111.796	111.971	111.966	112.129
10.45	110.52	110.882	111.055	111.318	111.394	111.537	111.692	111.796	111.975	111.963	112.129
10.475	110.517	110.88	111.055	111.32	111.397	111.536	111.694	111.795	111.973	111.964	112.132
10.5	110.519	110.882	111.057	111.32	111.394	111.537	111.695	111.791	111.971	111.963	112.132
10.525	110.519	110.879	111.055	111.322	111.397	111.535	111.695	111.793	111.974	111.962	112.129
10.55	110.517	110.882	111.055	111.319	111.395	111.539	111.697	111.793	111.974	111.964	112.131
10.575	110.518	110.879	111.055	111.319	111.398	111.538	111.695	111.791	111.973	111.963	112.13
10.6	110.519	110.881	111.058	111.32	111.397	111.54	111.695	111.793	111.974	111.962	112.131
10.625	110.519	110.879	111.055	111.32	111.397	111.537	111.695	111.793	111.971	111.959	112.132
10.65	110.519	110.882	111.058	111.319	111.398	111.537	111.694	111.79	111.974	111.957	112.132
10.675	110.519	110.88	111.055	111.323	111.397	111.538	111.695	111.793	111.974	111.96	112.132
10.7	110.519	110.881	111.055	111.321	111.398	111.54	111.695	111.793	111.973	111.962	112.131
10.725	110.517	110.882	111.056	111.32	111.389	111.54	111.696	111.792	111.972	111.959	112.133
10.75	110.519	110.88	111.055	111.319	111.393	111.538	111.697	111.795	111.973	111.963	112.132
10.775	110.518	110.881	111.056	111.32	111.392	111.54	111.698	111.793	111.975	111.96	112.132
10.8	110.519	110.882	111.058	111.322	111.394	111.538	111.695	111.794	111.974	111.961	112.13
10.825	110.517	110.88	111.055	111.323	111.394	111.539	111.697	111.793	111.975	111.96	112.132
10.85	110.52	110.881	111.051	111.323	111.391	111.538	111.698	111.794	111.973	111.96	112.129
10.875	110.518	110.882	111.052	111.32	111.392	111.54	111.694	111.796	111.975	111.961	112.126
10.9	110.519	110.882	111.049	111.32	111.391	111.54	111.696	111.795	111.974	111.963	112.13
10.925	110.519	110.882	111.052	111.323	111.392	111.538	111.696	111.794	111.969	111.961	112.129
10.95	110.521	110.883	111.052	111.32	111.394	111.54	111.698	111.795	111.969	111.963	112.129
10.975	110.517	110.88	111.049	111.321	111.394	111.538	111.695	111.794	111.971	111.962	112.129
11	110.519	110.882	111.051	111.323	111.393	111.538	111.698	111.795	111.969	111.963	112.129
11.025	110.522	110.882	111.052	111.323	111.392	111.543	111.699	111.797	111.97	111.964	112.128
11.05	110.519	110.882	111.05	111.323	111.392	111.54	111.697	111.796	111.971	111.963	112.129
11.075	110.519	110.881	111.051	111.323	111.394	111.541	111.698	111.796	111.971	111.963	112.132
11.1	110.52	110.882	111.05	111.325	111.393	111.541	111.7	111.794	111.969	111.962	112.132
11.125	110.519	110.88	111.052	111.323	111.395	111.54	111.693	111.795	111.971	111.963	112.132
11.15	110.52	110.881	111.05	111.324	111.394	111.54	111.694	111.792	111.972	111.96	112.132
11.175	110.518	110.883	111.05	111.323	111.395	111.54	111.695	111.79	111.971	111.96	112.13
11.2	110.522	110.882	111.053	111.325	111.396	111.54	111.692	111.791	111.971	111.962	112.132
11.225	110.519	110.881	111.049	111.325	111.394	111.54	111.692	111.79	111.971	111.959	112.13
11.25	110.519	110.882	111.05	111.326	111.394	111.533	111.695	111.793	111.972	111.961	112.131
11.275	110.52	110.882	111.049	111.323	111.395	111.537	111.694	111.793	111.972	111.962	112.132
11.3	110.52	110.88	111.052	111.326	111.394	111.534	111.695	111.79	111.974	111.961	112.13
11.325	110.523	110.882	111.049	111.326	111.396	111.537	111.695	111.794	111.972	111.962	112.128
11.35	110.515	110.883	111.052	111.327	111.396	111.539	111.695	111.792	111.969	111.965	112.125
11.375	110.52	110.879	111.052	111.325	111.395	111.534	111.695	111.79	111.971	111.96	112.129
11.4	110.52	110.879	111.052	111.325	111.393	111.537	111.697	111.793	111.972	111.963	112.129
11.425	110.519	110.882	111.05	111.324	111.395	111.538	111.695	111.793	111.972	111.963	112.132
11.45	110.522	110.881	111.051	111.328	111.396	111.538	111.698	111.793	111.972	111.963	112.129
11.475	110.519	110.88	111.052	111.325	111.395	111.538	111.697	111.793	111.971	111.965	112.131
11.5	110.521	110.88	111.051	111.325	111.395	111.536	111.698	111.793	111.972	111.963	112.129
11.525	110.52	110.879	111.052	111.326	111.395	111.539	111.698	111.794	111.972	111.963	112.129
11.55	110.521	110.882	111.051	111.326	111.395	111.537	111.697	111.793	111.965	111.963	112.13
11.575	110.519	110.881	111.052	111.328	111.392	111.54	111.698	111.793	111.968	111.963	112.131
11.6	110.521	110.88	111.052	111.327	111.397	111.538	111.698	111.794	111.969	111.963	112.133
11.625	110.519	110.88	111.053	111.325	111.395	111.54	111.696	111.793	111.969	111.963	112.131
11.65	110.519	110.88	111.053	111.328	111.396	111.539	111.698	111.796	111.969	111.966	112.132
11.675	110.521	110.879	111.05	111.326	111.395	111.54	111.701	111.794	111.968	111.959	112.133
11.7	110.519	110.88	111.052	111.33	111.395	111.538	111.699	111.791	111.969	111.96	112.132
11.725	110.517	110.879	111.052	111.326	111.395	111.54	111.699	111.796	111.969	111.96	112.135
11.75	110.519	110.881	111.051	111.326	111.397	111.54	111.698	111.793	111.969	111.962	112.132
11.775	110.519	110.882	111.055	111.329	111.396	111.538	111.696	111.794	111.971	111.961	112.132
11.8	110.519	110.882	111.049	111.325	111.394	111.54	111.701	111.795	111.968	111.96	112.128
11.825	110.52	110.882	111.053	111.325	111.397	111.54	111.699	111.794	111.97	111.963	112.126
11.85	110.518	110.88	111.052	111.326	111.395	111.541	111.7	111.79	111.969	111.962	112.128
11.875	110.52	110.88	111.053	111.326	111.397	111.538	111.7	111.79	111.968	111.963	112.128
11.9	110.519	110.881	111.049	111.327	111.397	111.54	111.695	111.791	111.969	111.962	112.132
11.925	110.52	110.88	111.054	111.328	111.398	111.541	111.694	111.788	111.971	111.961	112.129
11.95	110.518	110.88	111.052	111.327	111.397	111.543	111.695	111.793	111.968	111.963	112.131
11.975	110.522	110.879	111.053	111.326	111.395	111.54	111.695	111.788	111.971	111.963	112.13
12	110.517	110.88	111.053	111.32	111.394	111.54	111.695	111.791	111.967	111.963	112.131
12.025	110.52	110.879	111.052	111.323	111.394	111.54	111.696	111.79	111.968	111.966	112.131
12.05	110.517	110.882	111.052	111.324	111.391	111.543	111.697	111.791	111.971	111.964	112.132
12.075	110.522	110.88	111.049	111.322	111.394	111.54	111.695	111.792	111.97	111.966	112.129
12.1	110.519	110.882	111.053	111.323	111.39	111.543	111.697	111.793	111.966	111.963	112.132
12.125	110.52	110.879	111.053	111.323	111.392	111.54	111.697	111.793	111.97	111.966	112.133
12.15	110.519	110.881	111.052	111.324	111.391	111.542	111.698	111.793	111.969	111.966	112.132
12.175	110.521	110.88	111.052	111.321	111.394	111.543	111.7	111.79	111.966	111.965	112.131
12.2	110.516	110.879	111.053	111.321	111.391	111.54	111.698	111.791	111.964	111.96	112.132
12.225	110.52	110.881	111.053	111.323	111.394	111.541	111.697	111.793	111.966	111.96	112.13
12.25	110.52	110.882	111.053	111.323	111.393	111.538	111.698	111.79	111.964	111.963	112.131
12.275	110.522	110.882	111.052	111.323	111.392	111.538	111.698	111.793	111.965	111.961	112.128
12.3	110.519	110.881	111.052	111.324	111.392	111.538	111.698	111.792	111.966	111.962	112.13
12.325	110.52	110.879	111.052	111.321	111.394	111.538	111.698	111.793	111.966	111.961	112.128
12.35	110.519	110.882	111.053	111.324	111.392	111.538	111.699	111.795	111.969	111.968	112.131
12.375	110.519	110.882	111.052	111.32	111.393	111.538	111.697	111.793	111.966	111.964	112.133
12.4	110.519	110.882	111.053	111.322	111.393	111.538	111.698	111.792	111.966	111.963	112.133
12.425	110.518	110.882	111.052	111.324	111.394	111.54	111.699	111.794	111.967	111.964	112.13
12.45	110.522	110.882	111.052	111.323	111.394	111.538	111.698	111.794	111.966	111.962	112.129
12.475	110.519	110.884	111.054	111.324	111.395	111.54	111.699	111.793	111.967	111.966	112.129
12.5	110.519	110.881	111.051	111.323	111.394	111.538	111.698	111.793	111.967	111.966	112.133
12.525	110.519	110.882	111.052	111.325	111.393	111.54	111.696	111.79	111.967	111.966	112.132
12.55	110.52	110.882	111.053	111.324	111.394	111.54	111.698	111.789	111.968	111.965	112.132
12.575	110.52	110.882	111.051	111.323	111.393	111.54	111.698	111.789	111.966	111.966	112.134
12.6	110.519	110.883	111.053	111.323	111.394	111.542	111.697	111.791	111.966	111.966	112.135
12.625	110.52	110.882	111.052	111.323	111.394	111.54	111.7	111.79	111.966	111.966	112.13
12.65	110.518	110.884	111.053	111.324	111.392	111.54	111.699	111.792	111.969	111.966	112.133
12.675	110.519	110.883	111.055	111.323	111.396	111.54	111.701	111.789	111.966	111.966	112.132
12.7	110.52	110.882	111.053	111.323	111.395	111.541	111.694	111.791	111.966	111.966	112.133
12.725	110.518	110.882	111.055	111.324	111.397	111.54	111.696	111.791	111.967	111.962	112.129
12.75	110.519	110.882	111.052	111.323	111.394	111.542	111.694	111.793	111.969	111.962	112.13
12.775	110.52	110.882	111.054	111.325	111.396	111.54	111.697	111.79	111.967	111.963	112.13
12.8	110.522	110.88	111.053	111.323	111.395	111.544	111.694	111.79	111.965	111.966	112.131
12.825	110.519	110.885	111.054	111.323	111.397	111.538	111.694	111.793	111.96	111.963	112.132
12.85	110.519	110.882	111.055	111.323	111.395	111.542	111.696	111.793	111.962	111.964	112.132
12.875	110.518	110.883	111.054	111.324	111.396	111.541	111.695	111.793	111.962	111.964	112.132
12.9	110.519	110.882	111.053	111.323	111.395	111.543	111.697	111.792	111.963	111.965	112.132
12.925	110.519	110.882	111.055	111.323	111.397	111.54	111.698	111.793	111.964	111.963	112.13
12.95	110.52	110.884	111.053	111.323	111.395	111.541	111.696	111.794	111.963	111.963	112.132
12.975	110.518	110.88	111.053	111.325	111.397	111.543	111.697	111.793	111.967	111.964	112.131
13	110.517	110.882	111.052	111.323	111.397	111.542	111.697	111.791	111.963	111.966	112.132
13.025	110.519	110.88	111.052	111.325	111.395	111.541	111.698	111.793	111.963	111.965	112.132
13.05	110.52	110.883	111.054	111.325	111.395	111.544	111.698	111.794	111.963	111.966	112.133
13.075	110.519	110.881	111.053	111.324	111.396	111.54	111.697	111.794	111.965	111.969	112.132
13.1	110.519	110.883	111.055	111.325	111.395	111.543	111.697	111.79	111.965	111.963	112.132
13.125	110.519	110.882	111.055	111.323	111.397	111.543	111.699	111.793	111.965	111.966	112.13
13.15	110.519	110.881	111.056	111.323	111.395	111.543	111.699	111.793	111.965	111.965	112.13
13.175	110.518	110.882	111.054	111.323	111.396	111.541	111.698	111.793	111.963	111.966	112.133
13.2	110.519	110.88	111.054	111.325	111.397	111.541	111.698	111.79	111.965	111.965	112.128
13.225	110.519	110.88	111.052	111.326	111.397	111.543	111.698	111.788	111.966	111.965	112.127
13.25	110.517	110.881	111.055	111.326	111.395	111.538	111.7	111.79	111.966	111.963	112.13
13.275	110.516	110.882	111.056	111.323	111.394	111.538	111.698	111.79	111.965	111.961	112.129
13.3	110.519	110.884	111.055	111.323	111.391	111.538	111.7	111.788	111.964	111.962	112.129
13.325	110.52	110.881	111.055	111.325	111.388	111.539	111.7	111.789	111.965	111.96	112.13
13.35	110.517	110.882	111.056	111.322	111.391	111.537	111.698	111.79	111.966	111.965	112.129
13.375	110.519	110.882	111.054	111.326	111.391	111.538	111.7	111.791	111.965	111.963	112.13
13.4	110.516	110.882	111.055	111.323	111.391	111.537	111.7	111.79	111.966	111.963	112.129
13.425	110.52	110.882	111.055	111.324	111.391	111.538	111.698	111.792	111.963	111.962	112.129
13.45	110.519	110.882	111.052	111.325	111.391	111.538	111.701	111.793	111.961	111.963	112.129
13.475	110.518	110.882	111.05	111.325	111.391	111.54	111.7	111.79	111.96	111.962	112.131
13.5	110.519	110.883	111.052	111.325	111.389	111.54	111.695	111.793	111.96	111.963	112.13
13.525	110.52	110.882	111.051	111.323	111.391	111.537	111.697	111.792	111.96	111.965	112.132
13.55	110.519	110.882	111.051	111.326	111.392	111.539	111.692	111.791	111.96	111.964	112.131
13.575	110.519	110.882	111.052	111.327	111.394	111.54	111.697	111.791	111.962	111.966	112.129
13.6	110.517	110.885	111.052	111.322	111.391	111.541	111.695	111.791	111.963	111.965	112.135
13.625	110.519	110.882	111.051	111.321	111.394	111.54	111.695	111.793	111.963	111.963	112.128
13.65	110.518	110.885	111.049	111.322	111.391	111.54	111.695	111.793	111.965	111.965	112.131
13.675	110.517	110.882	111.052	111.323	111.394	111.54	111.697	111.793	111.963	111.965	112.125
13.7	110.516	110.883	111.05	111.323	111.393	111.54	111.695	111.793	111.962	111.965	112.126
13.725	110.52	110.883	111.049	111.322	111.393	111.54	111.699	111.792	111.961	111.966	112.126
13.75	110.517	110.883	111.051	111.322	111.394	111.54	111.697	111.792	111.963	111.965	112.128
13.775	110.517	110.883	111.05	111.323	111.394	111.541	111.697	111.793	111.963	111.962	112.128
13.8	110.517	110.882	111.051	111.321	111.393	111.54	111.7	111.793	111.963	111.96	112.129
13.825	110.517	110.883	111.05	111.323	111.392	111.541	111.698	111.793	111.962	111.96	112.129
13.85	110.516	110.882	111.049	111.32	111.393	111.541	111.696	111.793	111.962	111.96	112.127
13.875	110.517	110.885	111.052	111.322	111.394	111.542	111.699	111.791	111.962	111.963	112.129
13.9	110.517	110.885	111.05	111.323	111.394	111.541	111.698	111.788	111.965	111.962	112.129
13.925	110.518	110.884	111.052	111.323	111.392	111.542	111.698	111.791	111.962	111.963	112.127
13.95	110.518	110.884	111.05	111.322	111.395	111.539	111.7	111.788	111.963	111.963	112.131
13.975	110.519	110.886	111.051	111.322	111.394	111.542	111.698	111.789	111.963	111.962	112.124
14	110.516	110.885	111.051	111.323	111.394	111.543	111.701	111.789	111.962	111.963	112.129
14.025	110.518	110.885	111.051	111.326	111.392	111.541	111.701	111.788	111.965	111.962	112.129
14.05	110.516	110.884	111.052	111.323	111.392	111.544	111.698	111.793	111.956	111.963	112.129
14.075	110.519	110.885	111.051	111.324	111.394	111.541	111.7	111.789	111.96	111.963	112.129
14.1	110.516	110.886	111.052	111.325	111.392	111.54	111.702	111.791	111.959	111.963	112.129
14.125	110.517	110.884	111.049	111.324	111.396	111.543	111.701	111.791	111.961	111.963	112.127
14.15	110.517	110.882	111.052	111.323	111.394	111.541	111.698	111.793	111.96	111.966	112.127
14.175	110.517	110.879	111.05	111.326	111.395	111.544	111.702	111.791	111.959	111.966	112.124
14.2	110.517	110.88	111.051	111.325	111.395	111.54	111.703	111.79	111.961	111.965	112.126
14.225	110.518	110.88	111.052	111.325	111.395	111.543	111.7	111.793	111.959	111.966	112.126
14.25	110.519	110.88	111.052	111.325	111.394	111.536	111.704	111.789	111.96	111.965	112.126
14.275	110.514	110.88	111.048	111.327	111.393	111.537	111.699	111.792	111.96	111.965	112.125
14.3	110.517	110.88	111.052	111.324	111.397	111.536	111.697	111.792	111.962	111.964	112.128
14.325	110.516	110.879	111.05	111.323	111.395	111.537	111.697	111.794	111.96	111.96	112.128
14.35	110.519	110.879	111.053	111.326	111.397	111.536	111.697	111.791	111.962	111.962	112.129
14.375	110.518	110.882	111.05	111.326	111.392	111.535	111.697	111.793	111.96	111.961	112.126
14.4	110.519	110.879	111.052	111.324	111.395	111.536	111.695	111.791	111.961	111.962	112.126
14.425	110.516	110.88	111.049	111.325	111.394	111.538	111.695	111.793	111.961	111.963	112.129
14.45	110.517	110.883	111.052	111.325	111.396	111.537	111.697	111.793	111.962	111.965	112.129
14.475	110.516	110.882	111.05	111.326	111.396	111.539	111.696	111.791	111.962	111.963	112.126
14.5	110.519	110.881	111.052	111.325	111.394	111.538	111.698	111.792	111.96	111.964	112.129
14.525	110.516	110.882	111.052	111.326	111.396	111.54	111.698	111.792	111.963	111.963	112.128
14.55	110.517	110.882	111.053	111.325	111.396	111.54	111.698	111.788	111.959	111.963	112.127
14.575	110.516	110.881	111.05	111.325	111.393	111.537	111.695	111.79	111.963	111.963	112.127
14.6	110.512	110.882	111.054	111.326	111.389	111.539	111.699	111.789	111.962	111.967	112.124
14.625	110.517	110.882	111.052	111.324	111.393	111.539	111.698	111.788	111.963	111.964	112.123
14.65	110.516	110.882	111.053	111.323	111.392	111.538	111.697	111.787	111.964	111.966	112.126
14.675	110.517	110.88	111.052	111.326	111.394	111.54	111.698	111.79	111.957	111.965	112.126
14.7	110.514	110.882	111.05	111.325	111.392	111.541	111.7	111.79	111.957	111.965	112.124
14.725	110.517	110.88	111.053	111.326	111.393	111.54	111.699	111.788	111.958	111.963	112.126
14.75	110.514	110.881	111.052	111.326	111.392	111.54	111.7	111.788	111.959	111.966	112.124
14.775	110.516	110.882	111.054	111.325	111.392	111.54	111.698	111.791	111.957	111.963	112.124
14.8	110.513	110.882	111.051	111.324	111.393	111.541	111.698	111.791	111.959	111.965	112.127
14.825	110.515	110.885	111.053	111.328	111.394	111.538	111.698	111.791	111.96	111.965	112.126
14.85	110.516	110.882	111.05	111.325	111.395	111.54	111.7	111.791	111.961	111.961	112.126
14.875	110.517	110.883	111.051	111.326	111.392	111.543	111.698	111.792	111.959	111.964	112.127
14.9	110.513	110.883	111.053	111.324	111.393	111.54	111.701	111.79	111.96	111.963	112.129
14.925	110.515	110.882	111.052	111.325	111.395	111.54	111.701	111.792	111.96	111.962	112.127
14.95	110.515	110.882	111.052	111.327	111.394	111.544	111.696	111.792	111.955	111.963	112.129
14.975	110.517	110.882	111.052	111.325	111.395	111.541	111.697	111.793	111.962	111.965	112.126
15	110.516	110.882	111.052	111.327	111.394	111.54	111.698	111.793	111.96	111.963	112.129
15.025	110.514	110.882	111.053	111.324	111.396	111.543	111.698	111.792	111.96	111.963	112.126
15.05	110.517	110.882	111.05	111.327	111.395	111.544	111.7	111.792	111.96	111.963	112.128
15.075	110.513	110.88	111.052	111.327	111.395	111.544	111.696	111.791	111.96	111.962	112.121
15.1	110.513	110.883	111.052	111.324	111.395	111.541	111.694	111.793	111.96	111.963	112.123
15.125	110.514	110.883	111.049	111.325	111.395	111.543	111.694	111.79	111.96	111.966	112.121
15.15	110.514	110.88	111.052	111.328	111.395	111.54	111.694	111.793	111.96	111.965	112.124
15.175	110.514	110.885	111.052	111.325	111.395	111.541	111.695	111.793	111.96	111.963	112.126
15.2	110.516	110.882	111.052	111.32	111.397	111.543	111.694	111.792	111.959	111.966	112.124
15.225	110.514	110.884	111.05	111.322	111.394	111.544	111.696	111.788	111.96	111.966	112.126
15.25	110.516	110.882	111.052	111.316	111.396	111.539	111.692	111.786	111.962	111.964	112.125
15.275	110.513	110.883	111.054	111.32	111.397	111.538	111.693	111.788	111.959	111.966	112.123
15.3	110.514	110.883	111.05	111.319	111.394	111.538	111.697	111.79	111.954	111.967	112.124
15.325	110.513	110.882	111.052	111.32	111.397	111.536	111.694	111.787	111.956	111.966	112.126
15.35	110.515	110.884	111.051	111.321	111.395	111.539	111.695	111.788	111.956	111.968	112.126
15.375	110.515	110.883	111.052	111.321	111.398	111.537	111.694	111.79	111.956	111.966	112.127
15.4	110.517	110.883	111.049	111.322	111.394	111.537	111.692	111.788	111.959	111.961	112.129
15.425	110.516	110.883	111.054	111.322	111.395	111.538	111.692	111.79	111.957	111.963	112.127
15.45	110.514	110.885	111.052	111.321	111.394	111.54	111.695	111.79	111.957	111.964	112.126
15.475	110.516	110.885	111.052	111.322	111.397	111.538	111.695	111.79	111.956	111.963	112.127
15.5	110.514	110.882	111.05	111.321	111.397	111.541	111.694	111.79	111.957	111.965	112.127
15.525	110.514	110.882	111.052	111.322	111.397	111.537	111.695	111.79	111.957	111.964	112.124
15.55	110.514	110.884	111.05	111.322	111.398	111.543	111.698	111.788	111.957	111.966	112.124
15.575	110.513	110.883	111.053	111.32	111.397	111.54	111.695	111.793	111.96	111.966	112.123
15.6	110.515	110.884	111.051	111.321	111.396	111.54	111.698	111.788	111.96	111.963	112.126
15.625	110.516	110.882	111.05	111.322	111.396	111.54	111.695	111.79	111.957	111.965	112.124
15.65	110.514	110.883	111.053	111.323	111.397	111.54	111.698	111.792	111.959	111.966	112.124
15.675	110.516	110.882	111.051	111.322	111.398	111.539	111.695	111.79	111.958	111.967	112.123
15.7	110.514	110.881	111.053	111.322	111.396	111.541	111.695	111.79	111.957	111.966	112.125
15.725	110.513	110.884	111.05	111.323	111.397	111.54	111.695	111.791	111.96	111.966	112.124
15.75	110.513	110.881	111.052	111.32	111.394	111.542	111.695	111.791	111.959	111.966	112.127
15.775	110.516	110.882	111.052	111.322	111.398	111.54	111.696	111.79	111.959	111.967	112.123
15.8	110.515	110.883	111.053	111.323	111.4	111.541	111.693	111.79	111.957	111.965	112.124
15.825	110.513	110.881	111.052	111.322	111.397	111.543	111.695	111.79	111.961	111.966	112.127
15.85	110.514	110.882	111.052	111.323	111.39	111.541	111.693	111.791	111.957	111.966	112.124
15.875	110.514	110.882	111.052	111.322	111.392	111.543	111.692	111.791	111.959	111.965	112.127
15.9	110.515	110.881	111.054	111.322	111.391	111.542	111.693	111.79	111.954	111.967	112.123
15.925	110.515	110.881	111.052	111.323	111.392	111.543	111.692	111.788	111.955	111.961	112.126
15.95	110.514	110.883	111.053	111.324	111.392	111.541	111.693	111.787	111.955	111.962	112.125
15.975	110.514	110.88	111.055	111.323	111.392	111.541	111.69	111.787	111.956	111.963	112.124
16	110.513	110.883	111.054	111.324	111.391	111.543	111.692	111.787	111.956	111.963	112.124
16.025	110.516	110.882	111.051	111.323	111.394	111.543	111.692	111.787	111.956	111.964	112.12
16.05	110.516	110.882	111.049	111.325	111.391	111.543	111.693	111.785	111.954	111.965	112.124
16.075	110.514	110.882	111.049	111.324	111.391	111.542	111.692	111.787	111.957	111.963	112.123
16.1	110.516	110.882	111.048	111.323	111.393	111.543	111.691	111.788	111.957	111.965	112.123
16.125	110.514	110.881	111.049	111.323	111.395	111.543	111.693	111.787	111.957	111.963	112.124
16.15	110.515	110.882	111.051	111.325	111.391	111.543	111.692	111.789	111.955	111.965	112.124
16.175	110.513	110.883	111.048	111.325	111.393	111.54	111.692	111.788	111.958	111.961	112.123
16.2	110.514	110.881	111.049	111.325	111.391	111.543	111.692	111.79	111.957	111.966	112.124
16.225	110.512	110.883	111.048	111.324	111.393	111.543	111.69	111.787	111.954	111.968	112.124
16.25	110.516	110.881	111.052	111.323	111.394	111.541	111.694	111.788	111.957	111.966	112.123
16.275	110.516	110.883	111.049	111.323	111.393	111.536	111.693	111.79	111.957	111.967	112.125
16.3	110.515	110.882	111.049	111.325	111.391	111.54	111.695	111.788	111.957	111.968	112.127
16.325	110.514	110.882	111.05	111.325	111.394	111.538	111.694	111.789	111.956	111.966	112.123
16.35	110.516	110.883	111.05	111.326	111.392	111.539	111.694	111.789	111.959	111.966	112.124
16.375	110.513	110.88	111.051	111.324	111.394	111.54	111.694	111.79	111.957	111.966	112.124
16.4	110.514	110.882	111.049	111.325	111.391	111.538	111.692	111.79	111.957	111.968	112.126
16.425	110.513	110.88	111.051	111.325	111.393	111.54	111.694	111.791	111.959	111.966	112.124
16.45	110.514	110.882	111.05	111.325	111.392	111.537	111.695	111.792	111.957	111.962	112.125
16.475	110.513	110.882	111.051	111.326	111.394	111.54	111.695	111.79	111.957	111.963	112.121
16.5	110.513	110.882	111.049	111.326	111.393	111.538	111.692	111.789	111.955	111.963	112.121
16.525	110.513	110.883	111.052	111.325	111.395	111.541	111.694	111.792	111.955	111.964	112.121
16.55	110.511	110.884	111.049	111.326	111.395	111.54	111.695	111.786	111.953	111.964	112.124
16.575	110.515	110.88	111.049	111.326	111.393	111.54	111.695	111.788	111.954	111.963	112.121
16.6	110.514	110.882	111.052	111.326	111.393	111.542	111.694	111.786	111.953	111.965	112.123
16.625	110.513	110.882	111.051	111.326	111.392	111.54	111.695	111.785	111.954	111.965	112.124
16.65	110.515	110.881	111.05	111.327	111.394	111.541	111.692	111.789	111.955	111.966	112.122
16.675	110.513	110.885	111.05	111.326	111.392	111.54	111.692	111.785	111.956	111.965	112.121
16.7	110.514	110.882	111.052	111.328	111.394	111.54	111.689	111.787	111.956	111.966	112.12
16.725	110.514	110.882	111.052	111.326	111.395	111.54	111.689	111.788	111.954	111.968	112.121
16.75	110.513	110.883	111.05	111.326	111.394	111.54	111.691	111.787	111.956	111.966	112.125
16.775	110.515	110.88	111.051	111.325	111.394	111.541	111.689	111.788	111.957	111.966	112.124
16.8	110.512	110.881	111.052	111.326	111.394	111.541	111.691	111.788	111.955	111.968	112.123
16.825	110.516	110.885	111.052	111.323	111.392	111.54	111.689	111.788	111.954	111.966	112.123
16.85	110.516	110.882	111.051	111.323	111.394	111.543	111.691	111.788	111.956	111.966	112.122
16.875	110.514	110.882	111.053	111.321	111.394	111.541	111.69	111.789	111.956	111.969	112.124
16.9	110.517	110.881	111.053	111.319	111.395	111.541	111.688	111.789	111.956	111.965	112.121
16.925	110.513	110.885	111.05	111.322	111.395	111.543	111.692	111.787	111.957	111.969	112.124
16.95	110.514	110.882	111.054	111.323	111.395	111.542	111.691	111.791	111.957	111.969	112.118
16.975	110.513	110.883	111.052	111.32	111.395	111.543	111.692	111.791	111.957	111.966	112.121
17	110.513	110.881	111.055	111.322	111.392	111.543	111.691	111.788	111.957	111.963	112.12
17.025	110.514	110.88	111.052	111.322	111.394	111.543	111.691	111.792	111.957	111.963	112.121
17.05	110.513	110.883	111.052	111.321	111.394	111.543	111.692	111.79	111.958	111.963	112.122
17.075	110.514	110.882	111.052	111.322	111.396	111.543	111.694	111.789	111.956	111.965	112.121
17.1	110.514	110.884	111.054	111.322	111.395	111.543	111.693	111.79	111.957	111.965	112.118
17.125	110.516	110.883	111.054	111.323	111.394	111.543	111.692	111.789	111.957	111.966	112.123
17.15	110.513	110.883	111.052	111.323	111.391	111.545	111.692	111.792	111.954	111.965	112.121
17.175	110.514	110.883	111.052	111.323	111.392	111.543	111.693	111.788	111.953	111.966	112.12
17.2	110.513	110.884	111.054	111.323	111.39	111.543	111.693	111.793	111.952	111.967	112.124
17.225	110.513	110.884	111.052	111.323	111.389	111.544	111.693	111.79	111.953	111.965	112.124
17.25	110.513	110.882	111.053	111.323	111.392	111.54	111.692	111.79	111.949	111.965	112.123
17.275	110.514	110.884	111.05	111.325	111.391	111.537	111.691	111.787	111.954	111.966	112.123
17.3	110.515	110.882	111.052	111.323	111.391	111.539	111.692	111.787	111.954	111.966	112.123
17.325	110.514	110.883	111.052	111.323	111.391	111.539	111.692	111.787	111.954	111.966	112.123
17.35	110.513	110.882	111.055	111.324	111.393	111.54	111.693	111.787	111.952	111.968	112.121
17.375	110.513	110.884	111.054	111.323	111.391	111.538	111.695	111.789	111.953	111.968	112.124
17.4	110.513	110.883	111.055	111.326	111.394	111.54	111.694	111.787	111.953	111.968	112.12
17.425	110.516	110.885	111.054	111.325	111.392	111.541	111.694	111.787	111.956	111.971	112.118
17.45	110.514	110.885	111.053	111.326	111.393	111.541	111.688	111.787	111.954	111.968	112.117
17.475	110.513	110.884	111.051	111.326	111.391	111.541	111.69	111.787	111.952	111.967	112.121
17.5	110.515	110.887	111.053	111.325	111.393	111.54	111.687	111.788	111.954	111.968	112.118
17.525	110.512	110.881	111.056	111.325	111.391	111.541	111.69	111.787	111.955	111.963	112.119
17.55	110.517	110.885	111.052	111.324	111.393	111.541	111.689	111.789	111.954	111.963	112.121
17.575	110.513	110.885	111.055	111.324	111.392	111.541	111.689	111.789	111.954	111.966	112.121
17.6	110.515	110.883	111.052	111.325	111.396	111.542	111.689	111.791	111.956	111.966	112.121
17.625	110.513	110.886	111.055	111.325	111.392	111.54	111.689	111.79	111.953	111.969	112.121
17.65	110.513	110.886	111.053	111.325	111.392	111.54	111.689	111.791	111.954	111.966	112.12
17.675	110.513	110.885	111.055	111.325	111.392	111.541	111.692	111.79	111.954	111.966	112.121
17.7	110.514	110.884	111.052	111.325	111.394	111.542	111.691	111.79	111.957	111.965	112.121
17.725	110.515	110.884	111.056	111.326	111.394	111.543	111.692	111.79	111.954	111.966	112.122
17.75	110.511	110.886	111.052	111.324	111.394	111.541	111.689	111.788	111.954	111.965	112.123
17.775	110.514	110.882	111.055	111.323	111.392	111.544	111.692	111.79	111.954	111.966	112.121
17.8	110.513	110.882	111.053	111.326	111.395	111.543	111.691	111.791	111.95	111.969	112.121
17.825	110.514	110.886	111.053	111.326	111.395	111.542	111.687	111.793	111.951	111.966	112.122
17.85	110.513	110.884	111.053	111.326	111.39	111.541	111.692	111.791	111.949	111.97	112.123
17.875	110.516	110.885	111.055	111.325	111.394	111.544	111.69	111.79	111.951	111.968	112.118
17.9	110.515	110.885	111.056	111.326	111.395	111.541	111.69	111.79	111.951	111.969	112.116
17.925	110.516	110.886	111.052	111.323	111.394	111.543	111.689	111.79	111.953	111.967	112.117
17.95	110.514	110.885	111.055	111.326	111.395	111.54	111.691	111.787	111.953	111.969	112.118
17.975	110.513	110.886	111.053	111.325	111.395	111.543	111.689	111.784	111.953	111.966	112.118
18	110.516	110.884	111.053	111.325	111.395	111.543	111.693	111.787	111.951	111.969	112.118
18.025	110.513	110.887	111.054	111.326	111.395	111.542	111.691	111.787	111.953	111.965	112.121
18.05	110.514	110.884	111.055	111.325	111.394	111.543	111.691	111.786	111.953	111.966	112.121
18.075	110.513	110.885	111.055	111.326	111.395	111.544	111.691	111.787	111.954	111.965	112.118
18.1	110.516	110.885	111.055	111.327	111.394	111.543	111.691	111.787	111.951	111.964	112.12
18.125	110.515	110.886	111.055	111.326	111.392	111.542	111.691	111.787	111.954	111.969	112.118
18.15	110.513	110.888	111.053	111.324	111.394	111.543	111.694	111.787	111.954	111.966	112.121
18.175	110.516	110.884	111.055	111.325	111.395	111.542	111.689	111.792	111.953	111.97	112.12
18.2	110.516	110.886	111.054	111.326	111.396	111.543	111.691	111.786	111.954	111.966	112.121
18.225	110.517	110.885	111.056	111.323	111.393	111.543	111.691	111.787	111.951	111.968	112.12
18.25	110.514	110.888	111.053	111.326	111.395	111.539	111.689	111.79	111.954	111.966	112.12
18.275	110.514	110.885	111.055	111.326	111.393	111.537	111.687	111.788	111.954	111.966	112.121
18.3	110.516	110.887	111.056	111.326	111.394	111.54	111.686	111.787	111.954	111.966	112.118
18.325	110.515	110.888	111.057	111.326	111.394	111.537	111.689	111.788	111.956	111.968	112.118
18.35	110.513	110.886	111.055	111.325	111.397	111.537	111.689	111.791	111.953	111.968	112.116
18.375	110.517	110.886	111.056	111.326	111.394	111.537	111.687	111.788	111.954	111.968	112.118
18.4	110.514	110.887	111.052	111.327	111.391	111.537	111.689	111.789	111.954	111.969	112.117
18.425	110.515	110.886	111.057	111.323	111.388	111.537	111.687	111.792	111.95	111.968	112.118
18.45	110.514	110.885	111.055	111.323	111.39	111.539	111.691	111.79	111.95	111.97	112.118
18.475	110.513	110.885	111.056	111.323	111.391	111.54	111.688	111.789	111.948	111.969	112.12
18.5	110.514	110.888	111.058	111.322	111.391	111.539	111.691	111.79	111.95	111.969	112.118
18.525	110.513	110.886	111.059	111.323	111.39	111.536	111.688	111.792	111.953	111.971	112.119
18.55	110.515	110.887	111.055	111.322	111.388	111.54	111.691	111.79	111.95	111.971	112.121
18.575	110.516	110.884	111.056	111.322	111.388	111.538	111.688	111.79	111.951	111.963	112.118
18.6	110.514	110.885	111.056	111.321	111.392	111.54	111.686	111.79	111.95	111.964	112.123
18.625	110.516	110.888	111.054	111.321	111.389	111.54	111.69	111.787	111.953	111.966	112.12
18.65	110.514	110.886	111.05	111.322	111.392	111.539	111.689	111.786	111.954	111.966	112.12
18.675	110.516	110.887	111.053	111.32	111.392	111.539	111.689	111.787	111.951	111.966	112.122
18.7	110.516	110.888	111.052	111.323	111.39	111.542	111.691	111.786	111.952	111.966	112.121
18.725	110.516	110.888	111.052	111.323	111.391	111.539	111.688	111.787	111.952	111.968	112.12
18.75	110.516	110.888	111.052	111.32	111.391	111.54	111.69	111.787	111.954	111.966	112.118
18.775	110.515	110.888	111.052	111.322	111.393	111.54	111.689	111.788	111.952	111.966	112.118
18.8	110.515	110.886	111.052	111.32	111.389	111.541	111.689	111.787	111.954	111.967	112.116
18.825	110.513	110.889	111.051	111.322	111.39	111.541	111.689	111.789	111.949	111.968	112.117
18.85	110.516	110.888	111.05	111.325	111.389	111.539	111.691	111.79	111.954	111.968	112.118
18.875	110.515	110.889	111.049	111.323	111.394	111.543	111.691	111.787	111.952	111.969	112.12
18.9	110.515	110.888	111.051	111.324	111.391	111.539	111.691	111.79	111.954	111.968	112.117
18.925	110.517	110.89	111.052	111.324	111.392	111.54	111.69	111.79	111.951	111.969	112.117
18.95	110.515	110.888	111.051	111.324	111.392	111.541	111.689	111.79	111.954	111.968	112.119
18.975	110.513	110.888	111.052	111.323	111.391	111.543	111.689	111.79	111.954	111.969	112.118
19	110.516	110.889	111.051	111.323	111.392	111.54	111.692	111.79	111.957	111.968	112.118
19.025	110.516	110.887	111.052	111.323	111.394	111.541	111.692	111.789	111.949	111.968	112.12
19.05	110.518	110.888	111.05	111.322	111.391	111.542	111.684	111.79	111.948	111.968	112.118
19.075	110.514	110.886	111.052	111.323	111.392	111.542	111.688	111.793	111.948	111.969	112.121
19.1	110.516	110.885	111.052	111.325	111.392	111.541	111.686	111.791	111.951	111.963	112.121
19.125	110.515	110.884	111.053	111.323	111.391	111.542	111.686	111.79	111.949	111.966	112.121
19.15	110.516	110.886	111.051	111.324	111.392	111.538	111.688	111.792	111.951	111.964	112.118
19.175	110.517	110.883	111.052	111.323	111.392	111.541	111.686	111.791	111.95	111.966	112.121
19.2	110.517	110.882	111.05	111.326	111.394	111.54	111.689	111.794	111.951	111.966	112.118
19.225	110.516	110.884	111.053	111.325	111.391	111.543	111.686	111.793	111.948	111.966	112.12
19.25	110.517	110.883	111.051	111.323	111.392	111.538	111.687	111.792	111.95	111.966	112.119
19.275	110.516	110.885	111.052	111.326	111.394	111.536	111.69	111.793	111.952	111.968	112.115
19.3	110.516	110.882	111.052	111.323	111.393	111.538	111.688	111.789	111.951	111.963	112.115
19.325	110.516	110.884	111.053	111.323	111.391	111.537	111.688	111.788	111.951	111.967	112.117
19.35	110.516	110.883	111.052	111.326	111.394	111.538	111.689	111.79	111.95	111.966	112.118
19.375	110.516	110.885	111.052	111.323	111.392	111.534	111.689	111.787	111.951	111.966	112.118
19.4	110.516	110.885	111.053	111.325	111.393	111.537	111.688	111.79	111.953	111.968	112.118
19.425	110.518	110.885	111.052	111.325	111.393	111.535	111.69	111.79	111.953	111.968	112.115
19.45	110.516	110.885	111.051	111.325	111.394	111.538	111.689	111.793	111.95	111.969	112.12
19.475	110.518	110.882	111.053	111.324	111.39	111.54	111.691	111.788	111.952	111.97	112.121
19.5	110.517	110.885	111.052	111.323	111.394	111.538	111.689	111.791	111.951	111.969	112.118
19.525	110.516	110.885	111.05	111.323	111.394	111.539	111.69	111.793	111.951	111.969	112.118
19.55	110.516	110.886	111.053	111.328	111.394	111.54	111.691	111.79	111.954	111.969	112.12
19.575	110.516	110.885	111.052	111.323	111.395	111.539	111.689	111.791	111.953	111.968	112.118
19.6	110.518	110.886	111.053	111.325	111.392	111.54	111.69	111.793	111.951	111.966	112.12
19.625	110.517	110.886	111.052	111.327	111.394	111.538	111.69	111.791	111.952	111.966	112.118
19.65	110.517	110.886	111.053	111.325	111.394	111.54	111.691	111.791	111.954	111.965	112.12
19.675	110.518	110.885	111.053	111.326	111.392	111.538	111.689	111.793	111.948	111.966	112.12
19.7	110.516	110.886	111.051	111.327	111.386	111.541	111.692	111.791	111.949	111.966	112.119
19.725	110.519	110.887	111.053	111.325	111.389	111.54	111.692	111.792	111.95	111.968	112.115
19.75	110.517	110.886	111.053	111.323	111.388	111.54	111.691	111.792	111.949	111.967	112.117
19.775	110.517	110.885	111.052	111.326	111.389	111.54	111.689	111.794	111.951	111.968	112.117
19.8	110.516	110.888	111.054	111.323	111.388	111.54	111.692	111.794	111.95	111.968	112.115
19.825	110.519	110.888	111.051	111.326	111.391	111.539	111.689	111.794	111.952	111.966	112.119
19.85	110.514	110.885	111.052	111.326	111.391	111.54	111.684	111.794	111.949	111.969	112.116
19.875	110.516	110.885	111.049	111.326	111.391	111.54	111.688	111.794	111.953	111.969	112.116
19.9	110.517	110.885	111.052	111.326	111.391	111.54	111.685	111.793	111.95	111.969	112.117
19.925	110.516	110.886	111.052	111.325	111.388	111.539	111.686	111.796	111.951	111.969	112.115
19.95	110.517	110.883	111.053	111.328	111.392	111.538	111.687	111.794	111.951	111.969	112.117
19.975	110.515	110.886	111.053	111.327	111.389	111.542	111.686	111.791	111.954	111.971	112.115
20	110.517	110.885	111.053	111.327	111.391	111.541	111.688	111.79	111.953	111.97	112.118
20.025	110.517	110.888	111.052	111.326	111.389	111.54	111.688	111.791	111.953	111.969	112.118
20.05	110.517	110.885	111.053	111.322	111.39	111.541	111.688	111.79	111.953	111.968	112.118
20.075	110.516	110.885	111.052	111.32	111.391	111.538	111.686	111.792	111.953	111.972	112.118
20.1	110.518	110.886	111.051	111.322	111.39	111.541	111.691	111.793	111.953	111.971	112.117
20.125	110.516	110.883	111.053	111.32	111.389	111.54	111.688	111.79	111.952	111.972	112.118
20.15	110.515	110.888	111.053	111.321	111.388	111.539	111.688	111.794	111.953	111.965	112.119
20.175	110.519	110.886	111.052	111.32	111.391	111.54	111.689	111.79	111.954	111.965	112.118
20.2	110.515	110.885	111.053	111.32	111.392	111.539	111.686	111.791	111.954	111.968	112.115
20.225	110.516	110.888	111.055	111.321	111.391	111.54	111.689	111.795	111.954	111.966	112.115
20.25	110.518	110.886	111.052	111.32	111.391	111.537	111.688	111.794	111.953	111.969	112.115
20.275	110.517	110.886	111.055	111.32	111.392	111.535	111.691	111.791	111.954	111.967	112.118
20.3	110.516	110.885	111.055	111.321	111.39	111.537	111.689	111.793	111.95	111.968	112.116
20.325	110.517	110.885	111.053	111.32	111.394	111.532	111.691	111.795	111.948	111.969	112.115
20.35	110.516	110.887	111.055	111.322	111.391	111.535	111.688	111.794	111.951	111.968	112.118
20.375	110.517	110.886	111.056	111.32	111.392	111.534	111.689	111.793	111.951	111.966	112.117
20.4	110.517	110.888	111.055	111.32	111.391	111.534	111.69	111.794	111.951	111.969	112.118
20.425	110.516	110.886	111.053	111.322	111.392	111.537	111.689	111.795	111.95	111.969	112.115
20.45	110.519	110.885	111.055	111.322	111.389	111.535	111.69	111.792	111.952	111.972	112.119
20.475	110.519	110.888	111.054	111.322	111.392	111.535	111.691	111.796	111.948	111.972	112.119
20.5	110.517	110.885	111.056	111.323	111.391	111.537	111.689	111.794	111.951	111.969	112.118
20.525	110.519	110.887	111.055	111.322	111.392	111.536	111.691	111.796	111.953	111.972	112.12
20.55	110.516	110.887	111.053	111.32	111.392	111.538	111.691	111.795	111.951	111.971	112.119
20.575	110.519	110.885	111.055	111.322	111.392	111.537	111.689	111.794	111.951	111.972	112.12
20.6	110.518	110.888	111.055	111.322	111.391	111.537	111.692	111.796	111.951	111.972	112.118
20.625	110.519	110.886	111.058	111.32	111.392	111.538	111.686	111.794	111.951	111.972	112.12
20.65	110.516	110.887	111.056	111.323	111.392	111.537	111.684	111.791	111.951	111.972	112.117
20.675	110.519	110.886	111.053	111.322	111.391	111.538	111.686	111.791	111.953	111.971	112.115
20.7	110.519	110.886	111.056	111.322	111.392	111.534	111.686	111.793	111.954	111.967	112.115
20.725	110.518	110.888	111.055	111.321	111.392	111.538	111.684	111.79	111.954	111.967	112.117
20.75	110.519	110.886	111.057	111.321	111.393	111.539	111.686	111.793	111.953	111.969	112.118
20.775	110.518	110.887	111.051	111.324	111.395	111.538	111.69	111.791	111.954	111.969	112.117
20.8	110.519	110.888	111.055	111.323	111.391	111.54	111.686	111.79	111.953	111.971	112.117
20.825	110.516	110.887	111.055	111.323	111.394	111.538	111.687	111.794	111.953	111.968	112.114
20.85	110.52	110.886	111.056	111.323	111.391	111.539	111.689	111.791	111.954	111.97	112.117
20.875	110.517	110.886	111.058	111.32	111.392	111.539	111.689	111.791	111.953	111.969	112.118
20.9	110.519	110.886	111.056	111.322	111.392	111.54	111.689	111.793	111.957	111.971	112.115
20.925	110.518	110.886	111.058	111.322	111.393	111.537	111.689	111.792	111.947	111.97	112.12
20.95	110.518	110.885	111.055	111.322	111.391	111.54	111.688	111.794	111.951	111.971	112.121
20.975	110.518	110.885	111.056	111.324	111.389	111.538	111.688	111.793	111.948	111.972	112.118
21	110.52	110.886	111.057	111.322	111.388	111.539	111.689	111.792	111.951	111.971	112.118
21.025	110.519	110.885	111.058	111.323	111.387	111.539	111.687	111.796	111.951	111.972	112.12
21.05	110.516	110.886	111.055	111.323	111.388	111.539	111.689	111.796	111.951	111.971	112.118
21.075	110.519	110.884	111.057	111.322	111.386	111.54	111.691	111.794	111.951	111.973	112.118
21.1	110.516	110.885	111.058	111.322	111.387	111.538	111.692	111.798	111.952	111.972	112.12
21.125	110.517	110.885	111.059	111.322	111.385	111.539	111.69	111.794	111.951	111.97	112.12
21.15	110.518	110.885	111.056	111.322	111.387	111.538	111.688	111.796	111.952	111.974	112.115
21.175	110.519	110.885	111.057	111.323	111.388	111.541	111.689	111.796	111.954	111.97	112.115
21.2	110.519	110.885	111.055	111.32	111.388	111.539	111.688	111.796	111.951	111.972	112.115
21.225	110.517	110.886	111.053	111.32	111.388	111.54	111.689	111.799	111.95	111.966	112.114
21.25	110.519	110.885	111.051	111.322	111.388	111.535	111.691	111.796	111.953	111.969	112.116
21.275	110.519	110.886	111.054	111.322	111.388	111.534	111.692	111.795	111.95	111.969	112.118
21.3	110.519	110.885	111.053	111.322	111.388	111.534	111.691	111.793	111.953	111.971	112.117
21.325	110.519	110.885	111.052	111.323	111.388	111.537	111.689	111.793	111.953	111.971	112.118
21.35	110.519	110.886	111.052	111.323	111.388	111.534	111.689	111.79	111.956	111.969	112.12
21.375	110.519	110.888	111.052	111.324	111.388	111.535	111.689	111.791	111.95	111.969	112.118
21.4	110.519	110.888	111.053	111.325	111.386	111.533	111.688	111.792	111.951	111.971	112.118
21.425	110.517	110.887	111.053	111.323	111.389	111.536	111.685	111.79	111.953	111.969	112.118
21.45	110.519	110.888	111.053	111.323	111.388	111.531	111.683	111.794	111.953	111.972	112.116
21.475	110.519	110.885	111.053	111.321	111.388	111.535	111.684	111.792	111.953	111.971	112.118
21.5	110.519	110.885	111.053	111.323	111.391	111.537	111.686	111.79	111.951	111.974	112.118
21.525	110.519	110.884	111.052	111.323	111.388	111.537	111.686	111.793	111.954	111.971	112.118
21.55	110.517	110.886	111.052	111.323	111.388	111.536	111.685	111.791	111.948	111.97	112.118
21.575	110.517	110.885	111.054	111.325	111.391	111.537	111.686	111.795	111.95	111.974	112.118
21.6	110.517	110.885	111.05	111.323	111.388	111.534	111.685	111.793	111.948	111.971	112.113
21.625	110.517	110.888	111.055	111.323	111.388	111.537	111.688	111.793	111.948	111.971	112.115
21.65	110.518	110.887	111.052	111.319	111.391	111.535	111.686	111.791	111.95	111.969	112.115
21.675	110.519	110.886	111.055	111.318	111.389	111.537	111.687	111.795	111.947	111.971	112.116
21.7	110.516	110.887	111.053	111.319	111.388	111.538	111.688	111.793	111.95	111.973	112.115
21.725	110.517	110.886	111.055	111.318	111.389	111.537	111.683	111.795	111.951	111.972	112.116
21.75	110.518	110.887	111.052	111.317	111.39	111.537	111.686	111.793	111.948	111.968	112.115
21.775	110.52	110.885	111.055	111.319	111.388	111.536	111.689	111.795	111.954	111.968	112.118
21.8	110.516	110.888	111.053	111.317	111.39	111.538	111.687	111.793	111.95	111.966	112.115
21.825	110.519	110.888	111.056	111.318	111.389	111.539	111.686	111.794	111.952	111.969	112.118
21.85	110.517	110.888	111.052	111.317	111.388	111.537	111.688	111.794	111.95	111.969	112.117
21.875	110.519	110.886	111.053	111.318	111.392	111.54	111.686	111.793	111.951	111.971	112.116
21.9	110.518	110.886	111.052	111.32	111.391	111.539	111.688	111.796	111.948	111.971	112.118
21.925	110.519	110.888	111.054	111.317	111.391	111.54	111.688	111.796	111.952	111.97	112.118
21.95	110.519	110.885	111.052	111.32	111.39	111.537	111.686	111.796	111.953	111.969	112.118
21.975	110.519	110.886	111.055	111.318	111.39	111.539	111.687	111.796	111.95	111.969	112.118
22	110.518	110.888	111.055	111.317	111.391	111.539	111.688	111.793	111.951	111.969	112.118
22.025	110.522	110.886	111.054	111.319	111.389	111.538	111.688	111.793	111.951	111.973	112.119
22.05	110.519	110.888	111.052	111.32	111.39	111.54	111.688	111.79	111.95	111.97	112.115
22.075	110.519	110.887	111.056	111.32	111.39	111.54	111.689	111.79	111.953	111.974	112.111
22.1	110.52	110.889	111.053	111.319	111.39	111.54	111.686	111.792	111.953	111.97	112.114
22.125	110.519	110.886	111.055	111.318	111.391	111.54	111.689	111.793	111.95	111.972	112.115
22.15	110.517	110.888	111.058	111.32	111.391	111.539	111.688	111.793	111.952	111.972	112.118
22.175	110.52	110.889	111.052	111.318	111.392	111.54	111.689	111.793	111.945	111.974	112.117
22.2	110.519	110.888	111.055	111.322	111.39	111.54	111.689	111.793	111.947	111.969	112.114
22.225	110.519	110.89	111.054	111.319	111.389	111.54	111.683	111.791	111.947	111.972	112.115
22.25	110.519	110.888	111.055	111.32	111.388	111.536	111.683	111.793	111.948	111.972	112.115
22.275	110.52	110.888	111.055	111.32	111.385	111.536	111.684	111.793	111.948	111.971	112.118
22.3	110.519	110.888	111.058	111.317	111.385	111.535	111.685	111.793	111.948	111.969	112.115
22.325	110.52	110.887	111.055	111.321	111.388	111.537	111.685	111.793	111.947	111.966	112.117
22.35	110.519	110.888	111.056	111.32	111.386	111.535	111.686	111.791	111.948	111.969	112.118
22.375	110.519	110.891	111.058	111.321	111.385	111.534	111.686	111.793	111.947	111.971	112.12
22.4	110.517	110.89	111.055	111.321	111.39	111.537	111.687	111.797	111.951	111.972	112.113
22.425	110.52	110.888	111.055	111.32	111.385	111.535	111.687	111.793	111.947	111.971	112.119
22.45	110.52	110.888	111.055	111.32	111.388	111.535	111.684	111.794	111.948	111.97	112.118
22.475	110.519	110.888	111.054	111.319	111.387	111.537	111.685	111.794	111.95	111.97	112.118
22.5	110.519	110.888	111.058	111.319	111.391	111.534	111.686	111.794	111.948	111.97	112.118
22.525	110.519	110.891	111.056	111.319	111.387	111.537	111.686	111.796	111.951	111.969	112.114
22.55	110.522	110.889	111.056	111.322	111.389	111.538	111.686	111.793	111.951	111.971	112.112
22.575	110.519	110.889	111.058	111.32	111.389	111.538	111.686	111.793	111.95	111.973	112.114
22.6	110.518	110.888	111.057	111.319	111.388	111.537	111.688	111.796	111.948	111.972	112.115
22.625	110.519	110.89	111.056	111.322	111.388	111.537	111.686	111.796	111.948	111.969	112.115
22.65	110.521	110.889	111.058	111.32	111.391	111.54	111.688	111.793	111.951	111.972	112.116
22.675	110.517	110.888	111.058	111.318	111.389	111.537	111.689	111.793	111.948	111.974	112.118
22.7	110.522	110.888	111.057	111.32	111.391	111.538	111.689	111.788	111.951	111.974	112.115
22.725	110.521	110.889	111.061	111.321	111.39	111.538	111.688	111.788	111.949	111.97	112.117
22.75	110.519	110.89	111.058	111.32	111.389	111.541	111.688	111.791	111.951	111.972	112.115
22.775	110.522	110.888	111.058	111.319	111.39	111.539	111.689	111.79	111.95	111.972	112.115
22.8	110.519	110.891	111.059	111.32	111.39	111.54	111.689	111.79	111.948	111.972	112.118
22.825	110.52	110.891	111.058	111.323	111.391	111.539	111.688	111.792	111.945	111.968	112.117
22.85	110.52	110.891	111.058	111.319	111.39	111.54	111.688	111.79	111.947	111.969	112.118
22.875	110.522	110.889	111.057	111.32	111.391	111.54	111.688	111.793	111.947	111.966	112.118
22.9	110.521	110.889	111.059	111.321	111.388	111.543	111.688	111.791	111.948	111.969	112.117
22.925	110.521	110.891	111.058	111.319	111.391	111.54	111.686	111.793	111.945	111.971	112.12
22.95	110.522	110.89	111.058	111.322	111.391	111.542	111.689	111.792	111.949	111.969	112.117
22.975	110.521	110.89	111.058	111.319	111.39	111.541	111.689	111.793	111.946	111.972	112.117
23	110.522	110.892	111.059	111.319	111.389	111.541	111.686	111.791	111.948	111.972	112.114
23.025	110.521	110.891	111.058	111.322	111.391	111.541	111.686	111.792	111.949	111.971	112.112
23.05	110.519	110.889	111.058	111.32	111.391	111.54	111.683	111.793	111.95	111.969	112.114
23.075	110.519	110.89	111.056	111.322	111.392	111.541	111.685	111.795	111.946	111.97	112.115
23.1	110.522	110.889	111.057	111.32	111.391	111.541	111.683	111.794	111.951	111.972	112.116
23.125	110.521	110.888	111.057	111.32	111.391	111.541	111.686	111.793	111.947	111.974	112.114
23.15	110.522	110.889	111.058	111.32	111.39	111.54	111.684	111.791	111.95	111.969	112.115
23.175	110.519	110.888	111.057	111.32	111.391	111.541	111.684	111.794	111.951	111.972	112.114
23.2	110.521	110.892	111.057	111.323	111.392	111.543	111.686	111.796	111.95	111.974	112.114
23.225	110.522	110.889	111.059	111.32	111.391	111.541	111.686	111.793	111.95	111.972	112.117
23.25	110.522	110.888	111.059	111.32	111.39	111.543	111.684	111.796	111.949	111.975	112.116
23.275	110.522	110.889	111.058	111.316	111.391	111.535	111.687	111.795	111.95	111.972	112.117
23.3	110.522	110.89	111.059	111.317	111.394	111.538	111.684	111.796	111.951	111.973	112.117
23.325	110.522	110.89	111.061	111.317	111.391	111.538	111.686	111.794	111.952	111.974	112.116
23.35	110.52	110.891	111.057	111.316	111.394	111.537	111.688	111.793	111.951	111.967	112.115
23.375	110.523	110.89	111.056	111.316	111.391	111.537	111.686	111.791	111.95	111.969	112.115
23.4	110.522	110.889	111.057	111.315	111.393	111.536	111.691	111.787	111.95	111.969	112.118
23.425	110.52	110.891	111.058	111.315	111.392	111.536	111.688	111.793	111.945	111.969	112.116
23.45	110.521	110.889	111.058	111.317	111.393	111.54	111.689	111.79	111.945	111.972	112.117
23.475	110.521	110.891	111.06	111.317	111.392	111.538	111.687	111.791	111.947	111.969	112.112
23.5	110.524	110.891	111.056	111.318	111.392	111.54	111.689	111.79	111.947	111.97	112.112
23.525	110.523	110.891	111.058	111.317	111.386	111.539	111.689	111.79	111.947	111.972	112.114
23.55	110.522	110.89	111.056	111.317	111.389	111.541	111.687	111.791	111.947	111.969	112.116
23.575	110.522	110.891	111.058	111.317	111.388	111.543	111.689	111.792	111.948	111.969	112.115
23.6	110.522	110.889	111.056	111.316	111.389	111.541	111.689	111.791	111.948	111.972	112.114
23.625	110.522	110.889	111.058	111.315	111.39	111.538	111.688	111.793	111.948	111.971	112.116
23.65	110.522	110.89	111.059	111.317	111.388	111.54	111.689	111.791	111.95	111.972	112.112
23.675	110.522	110.891	111.061	111.317	111.388	111.539	111.688	111.793	111.947	111.972	112.115
23.7	110.52	110.892	111.058	111.319	111.387	111.541	111.687	111.794	111.947	111.972	112.116
23.725	110.523	110.892	111.059	111.316	111.391	111.542	111.69	111.792	111.947	111.974	112.115
23.75	110.522	110.889	111.061	111.319	111.389	111.541	111.686	111.793	111.951	111.971	112.115
23.775	110.522	110.891	111.058	111.316	111.39	111.54	111.687	111.794	111.947	111.972	112.117
23.8	110.523	110.891	111.056	111.318	111.389	111.54	111.688	111.793	111.95	111.974	112.116
23.825	110.522	110.891	111.054	111.317	111.39	111.541	111.683	111.792	111.948	111.971	112.115
23.85	110.522	110.893	111.055	111.318	111.391	111.54	111.683	111.793	111.951	111.972	112.118
23.875	110.523	110.891	111.053	111.32	111.391	111.543	111.684	111.794	111.951	111.968	112.117
23.9	110.523	110.892	111.055	111.32	111.392	111.543	111.686	111.793	111.948	111.968	112.116
23.925	110.521	110.891	111.053	111.317	111.389	111.541	111.684	111.796	111.951	111.969	112.115
23.95	110.522	110.892	111.055	111.317	111.391	111.54	111.687	111.791	111.95	111.97	112.112
23.975	110.523	110.891	111.053	111.319	111.389	111.54	111.686	111.795	111.95	111.972	112.116
24	110.522	110.891	111.055	111.32	111.389	111.544	111.685	111.794	111.951	111.971	112.114
24.025	110.524	110.892	111.051	111.321	111.393	111.543	111.686	111.794	111.952	111.973	112.114
24.05	110.523	110.891	111.054	111.318	111.392	111.54	111.687	111.793	111.945	111.973	112.116
24.075	110.522	110.885	111.053	111.318	111.392	111.542	111.687	111.788	111.949	111.971	112.116
24.1	110.524	110.886	111.053	111.319	111.391	111.542	111.689	111.791	111.947	111.97	112.117
24.125	110.523	110.886	111.052	111.319	111.392	111.54	111.685	111.79	111.946	111.972	112.113
24.15	110.523	110.885	111.054	111.32	111.392	111.541	111.687	111.791	111.948	111.97	112.115
24.175	110.52	110.888	111.055	111.32	111.39	111.54	111.685	111.791	111.949	111.971	112.114
24.2	110.523	110.886	111.056	111.32	111.392	111.542	111.686	111.789	111.948	111.975	112.115
24.225	110.522	110.887	111.054	111.32	111.391	111.541	111.688	111.791	111.947	111.972	112.118
24.25	110.523	110.887	111.055	111.32	111.392	111.543	111.686	111.79	111.947	111.972	112.118
24.275	110.522	110.889	111.053	111.319	111.392	111.538	111.686	111.791	111.948	111.973	112.115
24.3	110.525	110.889	111.053	111.319	111.392	111.538	111.689	111.791	111.948	111.972	112.118
24.325	110.522	110.888	111.053	111.319	111.391	111.537	111.689	111.792	111.948	111.974	112.115
24.35	110.523	110.889	111.052	111.32	111.396	111.539	111.688	111.791	111.95	111.976	112.116
24.375	110.522	110.887	111.055	111.322	111.391	111.537	111.688	111.793	111.948	111.977	112.117
24.4	110.521	110.889	111.055	111.319	111.393	111.538	111.689	111.793	111.951	111.972	112.117
24.425	110.523	110.888	111.052	111.319	111.391	111.538	111.688	111.794	111.948	111.969	112.11
24.45	110.521	110.889	111.054	111.32	111.392	111.538	111.689	111.794	111.949	111.969	112.113
24.475	110.522	110.889	111.055	111.32	111.393	111.539	111.688	111.794	111.951	111.97	112.114
24.5	110.522	110.888	111.053	111.322	111.391	111.54	111.692	111.793	111.95	111.973	112.113
24.525	110.523	110.887	111.056	111.32	111.392	111.54	111.689	111.793	111.952	111.969	112.115
24.55	110.522	110.891	111.054	111.321	111.394	111.539	111.689	111.794	111.949	111.972	112.115
24.575	110.526	110.888	111.055	111.32	111.394	111.54	111.689	111.793	111.951	111.972	112.116
24.6	110.523	110.889	111.055	111.319	111.395	111.538	111.682	111.793	111.948	111.972	112.117
24.625	110.523	110.891	111.054	111.319	111.394	111.54	111.684	111.796	111.95	111.974	112.117
24.65	110.52	110.887	111.055	111.32	111.394	111.54	111.683	111.793	111.946	111.974	112.115
24.675	110.524	110.891	111.055	111.32	111.395	111.541	111.686	111.792	111.944	111.972	112.117
24.7	110.526	110.887	111.055	111.32	111.393	111.539	111.682	111.793	111.943	111.975	112.118
24.725	110.523	110.891	111.056	111.319	111.395	111.542	111.684	111.792	111.947	111.973	112.115
24.75	110.524	110.89	111.055	111.321	111.393	111.54	111.684	111.789	111.945	111.971	112.119
24.775	110.524	110.89	111.055	111.32	111.394	111.543	111.686	111.791	111.947	111.975	112.116
24.8	110.523	110.889	111.052	111.32	111.39	111.54	111.685	111.79	111.945	111.975	112.117
24.825	110.523	110.888	111.055	111.32	111.389	111.54	111.686	111.787	111.947	111.973	112.118
24.85	110.523	110.89	111.053	111.322	111.391	111.541	111.686	111.79	111.947	111.974	112.115
24.875	110.525	110.891	111.055	111.318	111.391	111.541	111.686	111.791	111.945	111.974	112.115
24.9	110.523	110.889	111.056	111.315	111.389	111.543	111.684	111.793	111.946	111.975	112.112
24.925	110.525	110.891	111.055	111.317	111.39	111.54	111.687	111.792	111.948	111.974	112.115
24.95	110.522	110.888	111.055	111.315	111.39	111.543	111.688	111.791	111.947	111.969	112.117
24.975	110.524	110.886	111.057	111.316	111.388	111.54	111.688	111.792	111.948	111.971	112.115
25	110.524	110.888	111.052	111.317	111.391	111.544	111.687	111.79	111.948	111.971	112.114
25.025	110.522	110.891	111.055	111.316	111.39	111.545	111.687	111.791	111.948	111.973	112.118
25.05	110.524	110.888	111.055	111.316	111.39	111.541	111.686	111.791	111.947	111.973	112.115
25.075	110.523	110.888	111.055	111.317	111.391	111.543	111.686	111.793	111.95	111.971	112.115
25.1	110.523	110.89	111.058	111.317	111.391	111.544	111.686	111.793	111.948	111.972	112.115
25.125	110.524	110.889	111.058	111.315	111.392	111.541	111.688	111.793	111.948	111.973	112.118
25.15	110.524	110.888	111.055	111.314	111.391	111.545	111.687	111.792	111.947	111.971	112.116
25.175	110.524	110.889	111.055	111.319	111.392	111.543	111.689	111.79	111.948	111.972	112.117
25.2	110.523	110.889	111.056	111.317	111.391	111.545	111.686	111.793	111.95	111.974	112.118
25.225	110.525	110.889	111.056	111.317	111.391	111.543	111.688	111.793	111.946	111.974	112.116
25.25	110.522	110.886	111.055	111.316	111.393	111.543	111.688	111.791	111.949	111.972	112.117
25.275	110.525	110.886	111.057	111.315	111.391	111.541	111.689	111.793	111.946	111.972	112.118
25.3	110.522	110.89	111.057	111.318	111.392	111.54	111.689	111.793	111.944	111.974	112.114
25.325	110.524	110.886	111.053	111.318	111.391	111.536	111.687	111.792	111.941	111.972	112.117
25.35	110.523	110.888	111.058	111.317	111.392	111.541	111.69	111.793	111.943	111.975	112.111
25.375	110.525	110.889	111.058	111.316	111.392	111.539	111.689	111.793	111.945	111.974	112.112
25.4	110.522	110.888	111.057	111.319	111.392	111.54	111.681	111.788	111.945	111.974	112.114
25.425	110.525	110.888	111.054	111.319	111.393	111.538	111.686	111.787	111.944	111.975	112.117
25.45	110.524	110.888	111.058	111.318	111.393	111.54	111.682	111.789	111.947	111.972	112.113
25.475	110.524	110.89	111.057	111.318	111.394	111.541	111.686	111.787	111.945	111.971	112.115
25.5	110.525	110.891	111.056	111.317	111.394	111.54	111.684	111.789	111.945	111.969	112.112
25.525	110.523	110.888	111.053	111.319	111.395	111.541	111.686	111.79	111.945	111.969	112.114
25.55	110.525	110.891	111.057	111.316	111.395	111.54	111.686	111.79	111.945	111.971	112.115
25.575	110.525	110.89	111.055	111.319	111.392	111.543	111.686	111.791	111.946	111.971	112.115
25.6	110.525	110.889	111.058	111.317	111.394	111.542	111.686	111.789	111.946	111.971	112.115
25.625	110.526	110.889	111.057	111.317	111.394	111.543	111.686	111.791	111.948	111.97	112.115
25.65	110.525	110.89	111.06	111.313	111.395	111.542	111.687	111.791	111.95	111.972	112.116
25.675	110.525	110.889	111.057	111.317	111.394	111.541	111.686	111.792	111.946	111.971	112.117
25.7	110.524	110.891	111.058	111.316	111.397	111.543	111.685	111.79	111.945	111.972	112.118
25.725	110.528	110.891	111.058	111.318	111.393	111.543	111.686	111.79	111.946	111.972	112.115
25.75	110.525	110.888	111.058	111.319	111.395	111.541	111.686	111.789	111.944	111.969	112.115
25.775	110.524	110.889	111.056	111.316	111.392	111.544	111.686	111.791	111.948	111.973	112.115
25.8	110.525	110.891	111.058	111.317	111.397	111.543	111.688	111.791	111.946	111.974	112.115
25.825	110.525	110.888	111.058	111.317	111.394	111.546	111.688	111.79	111.948	111.972	112.109
25.85	110.525	110.891	111.056	111.316	111.397	111.543	111.687	111.792	111.948	111.972	112.114
25.875	110.525	110.888	111.058	111.319	111.397	111.544	111.688	111.792	111.947	111.974	112.112
25.9	110.525	110.891	111.056	111.318	111.395	111.542	111.689	111.792	111.944	111.975	112.111
25.925	110.525	110.889	111.056	111.32	111.394	111.544	111.689	111.793	111.944	111.971	112.116
25.95	110.525	110.891	111.057	111.316	111.398	111.545	111.686	111.794	111.941	111.972	112.112
25.975	110.523	110.891	111.056	111.316	111.394	111.543	111.686	111.79	111.943	111.971	112.114
26	110.525	110.888	111.058	111.316	111.397	111.543	111.686	111.794	111.942	111.967	112.113
26.025	110.525	110.891	111.058	111.319	111.394	111.546	111.689	111.794	111.943	111.969	112.113
26.05	110.523	110.89	111.057	111.317	111.394	111.545	111.686	111.791	111.942	111.969	112.115
26.075	110.525	110.891	111.058	111.317	111.389	111.543	111.687	111.79	111.944	111.968	112.114
26.1	110.525	110.889	111.059	111.319	111.391	111.543	111.689	111.79	111.942	111.969	112.118
26.125	110.523	110.891	111.058	111.319	111.389	111.544	111.689	111.789	111.942	111.971	112.118
26.15	110.524	110.891	111.056	111.319	111.393	111.543	111.687	111.788	111.945	111.969	112.115
26.175	110.525	110.888	111.056	111.319	111.391	111.546	111.683	111.788	111.942	111.972	112.115
26.2	110.526	110.891	111.057	111.318	111.391	111.544	111.683	111.79	111.945	111.97	112.117
26.225	110.525	110.889	111.058	111.319	111.388	111.546	111.681	111.79	111.944	111.969	112.115
26.25	110.525	110.889	111.058	111.319	111.39	111.546	111.683	111.79	111.945	111.969	112.117
26.275	110.525	110.891	111.057	111.32	111.392	111.543	111.685	111.788	111.945	111.969	112.109
26.3	110.525	110.891	111.058	111.32	111.391	111.541	111.683	111.79	111.944	111.973	112.112
26.325	110.526	110.89	111.054	111.319	111.391	111.541	111.686	111.79	111.947	111.971	112.114
26.35	110.525	110.888	111.06	111.317	111.393	111.542	111.681	111.788	111.944	111.972	112.112
26.375	110.525	110.891	111.057	111.32	111.391	111.541	111.684	111.788	111.945	111.971	112.112
26.4	110.525	110.889	111.053	111.319	111.392	111.543	111.683	111.789	111.945	111.972	112.115
26.425	110.524	110.891	111.052	111.319	111.392	111.541	111.686	111.791	111.946	111.971	112.114
26.45	110.525	110.891	111.052	111.321	111.391	111.541	111.686	111.79	111.945	111.972	112.115
26.475	110.525	110.889	111.051	111.319	111.391	111.542	111.683	111.79	111.945	111.972	112.112
26.5	110.526	110.891	111.054	111.316	111.391	111.542	111.685	111.793	111.945	111.971	112.113
26.525	110.526	110.891	111.05	111.314	111.393	111.544	111.686	111.79	111.942	111.968	112.115
26.55	110.526	110.89	111.052	111.316	111.393	111.543	111.683	111.79	111.94	111.969	112.115
26.575	110.525	110.891	111.05	111.315	111.394	111.543	111.684	111.792	111.941	111.966	112.114
26.6	110.526	110.888	111.05	111.314	111.392	111.544	111.686	111.79	111.941	111.966	112.115
26.625	110.525	110.891	111.052	111.315	111.394	111.544	111.686	111.791	111.942	111.97	112.117
26.65	110.524	110.888	111.053	111.316	111.392	111.546	111.685	111.794	111.941	111.967	112.115
26.675	110.525	110.891	111.049	111.314	111.393	111.543	111.686	111.79	111.942	111.97	112.115
26.7	110.525	110.889	111.053	111.316	111.392	111.546	111.687	111.794	111.944	111.97	112.115
26.725	110.525	110.891	111.052	111.314	111.391	111.542	111.685	111.793	111.942	111.969	112.117
26.75	110.527	110.89	111.053	111.316	111.394	111.546	111.688	111.79	111.942	111.969	112.112
26.775	110.525	110.89	111.051	111.314	111.395	111.546	111.687	111.787	111.942	111.971	112.112
26.8	110.525	110.892	111.052	111.314	111.394	111.544	111.686	111.788	111.941	111.971	112.111
26.825	110.526	110.892	111.053	111.316	111.391	111.546	111.688	111.787	111.942	111.969	112.111
26.85	110.526	110.889	111.051	111.314	111.394	111.545	111.688	111.79	111.943	111.971	112.114
26.875	110.525	110.892	111.05	111.314	111.394	111.546	111.688	111.787	111.942	111.97	112.112
26.9	110.525	110.893	111.054	111.316	111.393	111.549	111.686	111.79	111.941	111.971	112.115
26.925	110.527	110.891	111.052	111.317	111.395	111.546	111.687	111.791	111.943	111.971	112.113
26.95	110.524	110.891	111.052	111.319	111.394	111.547	111.687	111.787	111.941	111.967	112.114
26.975	110.525	110.892	111.052	111.317	111.394	111.546	111.681	111.791	111.941	111.972	112.116
27	110.524	110.891	111.054	111.317	111.395	111.546	111.683	111.791	111.942	111.972	112.113
27.025	110.525	110.892	111.052	111.318	111.393	111.549	111.683	111.79	111.944	111.97	112.117
27.05	110.526	110.892	111.05	111.316	111.394	111.547	111.683	111.792	111.941	111.967	112.115
27.075	110.525	110.891	111.053	111.319	111.394	111.548	111.682	111.79	111.942	111.966	112.115
27.1	110.525	110.894	111.052	111.315	111.394	111.547	111.681	111.79	111.942	111.967	112.118
27.125	110.525	110.889	111.053	111.314	111.394	111.544	111.684	111.793	111.944	111.967	112.115
27.15	110.526	110.891	111.052	111.317	111.395	111.55	111.683	111.79	111.941	111.968	112.115
27.175	110.525	110.892	111.051	111.316	111.395	111.546	111.686	111.791	111.938	111.969	112.117
27.2	110.523	110.891	111.053	111.316	111.394	111.548	111.686	111.791	111.94	111.967	112.112
27.225	110.526	110.891	111.053	111.317	111.395	111.549	111.686	111.793	111.938	111.969	112.111
27.25	110.526	110.893	111.054	111.317	111.397	111.548	111.686	111.793	111.94	111.966	112.111
27.275	110.524	110.891	111.055	111.315	111.397	111.547	111.685	111.793	111.94	111.969	112.112
27.3	110.526	110.892	111.051	111.317	111.396	111.54	111.685	111.79	111.939	111.969	112.111
27.325	110.525	110.889	111.054	111.317	111.393	111.544	111.684	111.791	111.942	111.968	112.111
27.35	110.527	110.892	111.053	111.317	111.389	111.543	111.686	111.792	111.938	111.97	112.113
27.375	110.525	110.893	111.052	111.317	111.391	111.543	111.685	111.793	111.939	111.968	112.114
27.4	110.526	110.894	111.05	111.318	111.39	111.543	111.687	111.79	111.94	111.972	112.112
27.425	110.525	110.893	111.055	111.319	111.391	111.543	111.687	111.791	111.938	111.971	112.113
27.45	110.525	110.891	111.052	111.317	111.389	111.543	111.684	111.788	111.941	111.969	112.115
27.475	110.527	110.893	111.054	111.318	111.392	111.546	111.687	111.787	111.939	111.97	112.114
27.5	110.527	110.891	111.053	111.32	111.39	111.543	111.686	111.79	111.941	111.971	112.114
27.525	110.525	110.892	111.053	111.319	111.39	111.544	111.686	111.79	111.941	111.969	112.115
27.55	110.526	110.894	111.054	111.319	111.394	111.544	111.687	111.79	111.942	111.971	112.114
27.575	110.525	110.892	111.053	111.317	111.392	111.546	111.688	111.79	111.942	111.965	112.113
27.6	110.527	110.891	111.053	111.316	111.394	111.545	111.687	111.788	111.937	111.966	112.114
27.625	110.525	110.891	111.052	111.32	111.392	111.546	111.688	111.79	111.941	111.966	112.114
27.65	110.526	110.893	111.052	111.317	111.392	111.546	111.686	111.788	111.941	111.966	112.114
27.675	110.526	110.893	111.051	111.32	111.392	111.544	111.69	111.787	111.941	111.968	112.112
27.7	110.524	110.892	111.055	111.319	111.393	111.544	111.684	111.789	111.939	111.968	112.112
27.725	110.525	110.892	111.052	111.319	111.392	111.545	111.687	111.791	111.942	111.969	112.111
27.75	110.526	110.89	111.055	111.32	111.393	111.549	111.686	111.788	111.938	111.968	112.112
27.775	110.526	110.893	111.052	111.319	111.394	111.545	111.683	111.79	111.936	111.965	112.112
27.8	110.523	110.89	111.055	111.323	111.392	111.546	111.682	111.791	111.934	111.968	112.114
27.825	110.525	110.893	111.053	111.32	111.392	111.545	111.683	111.789	111.936	111.968	112.112
27.85	110.525	110.892	111.055	111.32	111.391	111.547	111.683	111.793	111.936	111.969	112.113
27.875	110.526	110.894	111.052	111.32	111.394	111.546	111.681	111.791	111.938	111.969	112.112
27.9	110.523	110.894	111.055	111.317	111.394	111.547	111.686	111.791	111.937	111.971	112.109
27.925	110.527	110.892	111.052	111.32	111.395	111.546	111.683	111.791	111.936	111.969	112.114
27.95	110.527	110.892	111.054	111.32	111.391	111.55	111.682	111.791	111.936	111.969	112.109
27.975	110.523	110.892	111.053	111.319	111.394	111.549	111.686	111.792	111.938	111.969	112.116
28	110.526	110.891	111.054	111.319	111.393	111.546	111.685	111.793	111.939	111.971	112.114
28.025	110.524	110.894	111.052	111.32	111.395	111.549	111.686	111.791	111.939	111.968	112.115
28.05	110.524	110.895	111.054	111.32	111.393	111.549	111.685	111.794	111.937	111.969	112.115
28.075	110.523	110.892	111.055	111.32	111.395	111.547	111.683	111.793	111.939	111.97	112.115
28.1	110.525	110.893	111.053	111.317	111.394	111.547	111.685	111.79	111.939	111.968	112.112
28.125	110.525	110.893	111.052	111.317	111.394	111.549	111.683	111.787	111.936	111.965	112.115
28.15	110.525	110.892	111.054	111.317	111.393	111.549	111.688	111.789	111.939	111.964	112.111
28.175	110.525	110.896	111.054	111.314	111.396	111.548	111.685	111.79	111.938	111.966	112.111
28.2	110.524	110.894	111.056	111.317	111.393	111.548	111.686	111.789	111.939	111.968	112.112
28.225	110.525	110.893	111.054	111.314	111.395	111.547	111.686	111.79	111.939	111.968	112.113
28.25	110.524	110.894	111.052	111.316	111.394	111.547	111.689	111.79	111.938	111.967	112.113
28.275	110.525	110.893	111.055	111.313	111.397	111.551	111.684	111.785	111.938	111.969	112.113
28.3	110.525	110.893	111.053	111.315	111.394	111.543	111.686	111.793	111.938	111.968	112.112
28.325	110.525	110.894	111.053	111.315	111.392	111.543	111.689	111.788	111.939	111.966	112.112
28.35	110.524	110.894	111.055	111.316	111.395	111.541	111.686	111.791	111.938	111.968	112.112
28.375	110.523	110.895	111.052	111.317	111.395	111.544	111.689	111.792	111.94	111.968	112.115
28.4	110.523	110.895	111.055	111.314	111.394	111.544	111.688	111.79	111.938	111.969	112.111
28.425	110.525	110.894	111.055	111.316	111.395	111.543	111.689	111.788	111.934	111.966	112.116
28.45	110.523	110.893	111.055	111.315	111.394	111.543	111.689	111.791	111.935	111.97	112.114
28.475	110.525	110.893	111.052	111.315	111.395	111.544	111.689	111.791	111.934	111.969	112.114
28.5	110.522	110.892	111.053	111.316	111.394	111.543	111.688	111.793	111.933	111.968	112.114
28.525	110.522	110.894	111.052	111.316	111.394	111.544	111.69	111.793	111.937	111.968	112.115
28.55	110.523	110.894	111.053	111.314	111.395	111.546	111.685	111.792	111.936	111.968	112.112
28.575	110.524	110.892	111.052	111.318	111.394	111.546	111.683	111.792	111.937	111.969	112.115
28.6	110.523	110.894	111.054	111.317	111.394	111.544	111.686	111.792	111.938	111.969	112.114
28.625	110.525	110.894	111.054	111.317	111.388	111.546	111.683	111.791	111.937	111.969	112.112
28.65	110.522	110.894	111.053	111.314	111.391	111.547	111.685	111.79	111.934	111.963	112.107
28.675	110.523	110.893	111.055	111.317	111.389	111.544	111.684	111.792	111.936	111.963	112.111
28.7	110.523	110.894	111.055	111.316	111.391	111.546	111.684	111.791	111.936	111.966	112.109
28.725	110.522	110.891	111.053	111.315	111.391	111.543	111.686	111.793	111.936	111.965	112.11
28.75	110.524	110.889	111.053	111.319	111.391	111.546	111.686	111.791	111.938	111.968	112.112
28.775	110.523	110.892	111.055	111.315	111.391	111.545	111.686	111.79	111.936	111.965	112.109
28.8	110.526	110.892	111.054	111.316	111.39	111.545	111.688	111.786	111.938	111.966	112.112
28.825	110.525	110.894	111.052	111.317	111.392	111.544	111.688	111.788	111.938	111.967	112.112
28.85	110.525	110.893	111.055	111.317	111.391	111.546	111.686	111.789	111.938	111.966	112.112
28.875	110.523	110.893	111.055	111.319	111.394	111.547	111.688	111.786	111.936	111.964	112.112
28.9	110.525	110.892	111.054	111.318	111.389	111.545	111.687	111.792	111.938	111.968	112.115
28.925	110.522	110.895	111.054	111.315	111.392	111.547	111.686	111.786	111.935	111.964	112.113
28.95	110.523	110.894	111.055	111.316	111.393	111.547	111.688	111.79	111.936	111.969	112.115
28.975	110.524	110.894	111.053	111.317	111.392	111.547	111.686	111.79	111.936	111.969	112.113
29	110.522	110.893	111.049	111.317	111.391	111.546	111.689	111.789	111.935	111.968	112.112
29.025	110.525	110.892	111.048	111.317	111.394	111.547	111.688	111.791	111.934	111.969	112.111
29.05	110.521	110.889	111.05	111.314	111.391	111.547	111.69	111.791	111.936	111.968	112.112
29.075	110.525	110.889	111.052	111.314	111.391	111.548	111.686	111.791	111.932	111.969	112.111
29.1	110.522	110.888	111.047	111.317	111.391	111.549	111.688	111.79	111.933	111.968	112.106
29.125	110.522	110.89	111.05	111.314	111.394	111.546	111.689	111.792	111.931	111.969	112.109
29.15	110.524	110.888	111.047	111.317	111.392	111.548	111.688	111.79	111.935	111.968	112.112
29.175	110.525	110.889	111.05	111.318	111.392	111.546	111.689	111.792	111.933	111.963	112.11
29.2	110.522	110.886	111.049	111.317	111.392	111.547	111.689	111.791	111.934	111.966	112.112
29.225	110.523	110.89	111.049	111.318	111.389	111.546	111.686	111.791	111.934	111.964	112.112
29.25	110.525	110.889	111.048	111.316	111.393	111.547	111.688	111.79	111.934	111.964	112.109
29.275	110.522	110.888	111.049	111.319	111.392	111.548	111.688	111.79	111.933	111.966	112.11
29.3	110.523	110.889	111.048	111.319	111.392	111.543	111.689	111.79	111.934	111.966	112.111
29.325	110.523	110.889	111.05	111.316	111.394	111.543	111.69	111.788	111.933	111.966	112.112
29.35	110.523	110.888	111.049	111.317	111.392	111.54	111.684	111.791	111.934	111.968	112.111
29.375	110.523	110.891	111.049	111.316	111.392	111.542	111.686	111.79	111.935	111.968	112.112
29.4	110.524	110.891	111.05	111.319	111.393	111.54	111.683	111.793	111.933	111.966	112.114
29.425	110.522	110.891	111.049	111.317	111.394	111.543	111.686	111.79	111.933	111.966	112.112
29.45	110.525	110.888	111.047	111.317	111.392	111.54	111.684	111.79	111.933	111.966	112.111
29.475	110.522	110.888	111.05	111.32	111.395	111.543	111.683	111.787	111.933	111.966	112.113
29.5	110.524	110.891	111.048	111.317	111.392	111.544	111.686	111.786	111.933	111.965	112.111
29.525	110.523	110.89	111.05	111.319	111.395	111.543	111.684	111.785	111.934	111.967	112.114
29.55	110.524	110.891	111.049	111.317	111.394	111.544	111.688	111.785	111.936	111.966	112.107
29.575	110.522	110.89	111.051	111.32	111.394	111.541	111.688	111.786	111.934	111.967	112.111
29.6	110.525	110.892	111.047	111.319	111.395	111.546	111.686	111.788	111.934	111.969	112.109
29.625	110.524	110.892	111.049	111.315	111.395	111.544	111.688	111.787	111.933	111.966	112.109
29.65	110.523	110.892	111.049	111.319	111.394	111.546	111.689	111.79	111.934	111.968	112.109
29.675	110.524	110.889	111.049	111.318	111.394	111.544	111.684	111.787	111.93	111.968	112.109
29.7	110.525	110.89	111.047	111.317	111.395	111.543	111.686	111.789	111.93	111.964	112.111
29.725	110.525	110.889	111.049	111.315	111.393	111.544	111.689	111.788	111.93	111.963	112.112
29.75	110.522	110.891	111.049	111.314	111.394	111.545	111.686	111.788	111.93	111.963	112.111
29.775	110.523	110.891	111.052	111.314	111.394	111.544	111.689	111.791	111.933	111.963	112.111
29.8	110.525	110.892	111.048	111.313	111.394	111.544	111.689	111.79	111.93	111.964	112.11
29.825	110.524	110.891	111.049	111.314	111.394	111.546	111.688	111.791	111.93	111.966	112.112
29.85	110.523	110.889	111.047	111.314	111.394	111.546	111.689	111.791	111.933	111.963	112.11
29.875	110.525	110.89	111.052	111.313	111.394	111.542	111.686	111.79	111.933	111.966	112.113
29.9	110.527	110.889	111.046	111.314	111.392	111.547	111.689	111.792	111.933	111.962	112.113
29.925	110.524	110.891	111.048	111.316	111.391	111.544	111.692	111.789	111.931	111.966	112.111
29.95	110.525	110.891	111.05	111.312	111.391	111.547	111.688	111.793	111.93	111.966	112.109
29.975	110.525	110.889	111.047	111.312	111.389	111.546	111.691	111.793	111.931	111.965	112.112
30	110.525	110.891	111.05	111.314	111.388	111.545	111.691	111.792	111.934	111.966	112.114
