# Supplementary material for: A noninvasive and comprehensive method for continuous assessment of cerebral blood flow pulsation based on magnetic induction phase shift
Source: PeerJ. 2022 Feb 23;10:e13002. doi: 10.7717/peerj.13002 (PMC8881914; doi:10.7717/peerj.13002)
Supplement: Supplemental Information 2 [file peerj-10-13002-s002.xlsx]

## Sheet: Sheet1
Volunteer1			Volunteer2			Volunteer3			Volunteer4
t(s)	MIPS(°)	ECG(V)	t(s)	MIPS(°)	ECG(V)	t(s)	MIPS(°)	ECG(V)	t(s)	MIPS(°)	ECG(V)
109.25	0.01757	-74.0938	119.525	0.000671121	11.6875	60	-0.0167893	-132.5	96	0.006252	-28.2812
109.275	0.01488	-142.594	119.55	0.0939287	-26.0938	60.025	-0.0147739	-49.0312	96.025	0.00212104	-21.0625
109.3	0.0122	-131.188	119.575	0.184861	-64.1875	60.05	-0.0121501	-49.75	96.05	-0.00230342	-1.125
109.325	0.00962	-55.4062	119.6	0.269447	-14.125	60.075	-0.0089771	-132.938	96.075	-0.00670794	8.8125
109.35	0.00718	-70.5	119.625	0.344089	17.9375	60.1	-0.0053349	-120.344	96.1	-0.0108137	-36.4375
109.375	0.00491	-153.656	119.65	0.40577	-21.4062	60.125	-0.00132142	-92.5	96.125	-0.0143921	-33.5312
109.4	0.0028	-124.812	119.675	0.45219	1.34375	60.15	0.0029512	-81.4375	96.15	-0.0172744	-20.4375
109.425	0.000826011	-38.8125	119.7	0.481852	-7.59375	60.175	0.00736016	-116.656	96.175	-0.0193538	218.25
109.45	-0.00106	-65.875	119.725	0.494099	-16.3438	60.2	0.0117757	-119.344	96.2	-0.020582	-559.469
109.475	-0.00292	-149.844	119.75	0.489112	-40.8438	60.225	0.0160647	-92.25	96.225	-0.0209594	-14.4688
109.5	-0.00478	-133.938	119.775	0.467858	-40.0312	60.25	0.0200939	-65.125	96.25	-0.0205214	-0.96875
109.525	-0.0067	-60.1875	119.8	0.431999	364.406	60.275	0.023734	-56.4375	96.275	-0.0193234	-22.0312
109.55	-0.0087	-33.1875	119.825	0.383773	-327.125	60.3	0.026862	-100.906	96.3	-0.0174283	6.5
109.575	-0.01076	-141.188	119.85	0.325842	-18.375	60.325	0.0293652	-99.0625	96.325	-0.0148984	49.0938
109.6	-0.01286	-127.062	119.875	0.261135	4.9375	60.35	0.0311442	-77.375	96.35	-0.0117937	86.0625
109.625	-0.01494	-65	119.9	0.192687	7.8125	60.375	0.0321157	-136.344	96.375	-0.00817726	95.7188
109.65	-0.01692	62.3125	119.925	0.123473	61.625	60.4	0.0322155	-164.656	96.4	-0.00412292	123.938
109.675	-0.01872	-142.062	119.95	0.056277	41.75	60.425	0.0314016	215.375	96.425	0.000274558	153.719
109.7	-0.02023	-112.719	119.975	-0.00643691	35.5625	60.45	0.029656	-184.844	96.45	0.00489159	165.5
109.725	-0.02135	-40.7188	120	-0.0626107	97.4062	60.475	0.0269872	-130.125	96.475	0.00957141	60.5312
109.75	-0.022	-41.4688	120.025	-0.110656	177.562	60.5	0.0234311	-116.469	96.5	0.0141246	-17.3125
109.775	-0.0221	-85.0312	120.05	-0.149482	159.906	60.525	0.0190519	-71.7188	96.525	0.0183352	-1.875
109.8	-0.02159	-79.8125	120.075	-0.178495	135.781	60.55	0.0139415	-59.9375	96.55	0.0219718	1.5
109.825	-0.02046	34.9375	120.1	-0.197568	105.125	60.575	0.00821873	-89.3125	96.575	0.0248029	-25.5938
109.85	-0.01871	29.75	120.125	-0.206989	40.3438	60.6	0.00202673	-55.5938	96.6	0.0266158	-16.7188
109.875	-0.01637	15.7188	120.15	-0.207386	-18.8125	60.625	-0.0044702	9.1875	96.625	0.027236	9.8125
109.9	-0.0135	20.5625	120.175	-0.199652	-41.0938	60.65	-0.0110909	75.2188	96.65	0.0265464	29.3438
109.925	-0.01017	113.375	120.2	-0.184859	-19.9375	60.675	-0.0176424	42.5938	96.675	0.0245015	-8.28125
109.95	-0.0065	29.4375	120.225	-0.164182	4.34375	60.7	-0.0239259	-1.65625	96.7	0.0211367	-13.5312
109.975	-0.0026	-123.812	120.25	-0.138833	9.40625	60.725	-0.0297431	8.21875	96.725	0.0165699	19.4062
110	0.00141	-107.406	120.275	-0.110007	-56.0625	60.75	-0.0349027	-51.1562	96.75	0.0109952	2.65625
110.025	0.00538	-60.6562	120.3	-0.0788552	-14.5625	60.775	-0.0392276	-109.125	96.775	0.00467082	3.1875
110.05	0.0092	-36.4062	120.325	-0.0464585	16.9688	60.8	-0.0425605	-127.625	96.8	-0.00209805	24.2188
110.075	0.01273	-136.938	120.35	-0.0138311	-26.2812	60.825	-0.0447707	-93.4375	96.825	-0.00897924	0.59375
110.1	0.01586	-134.781	120.375	0.0180737	-65.2812	60.85	-0.0457588	-82.3125	96.85	-0.0156336	-18.3125
110.125	0.01848	-69.0625	120.4	0.0483492	-39.0625	60.875	-0.045461	-114.25	96.875	-0.0217336	-24.9688
110.15	0.02051	-33.5312	120.425	0.0761192	31.1875	60.9	-0.0438524	-100.906	96.9	-0.0269802	207.906
110.175	0.02188	-134.969	120.45	0.100527	2.0625	60.925	-0.0409486	-111.781	96.925	-0.0311151	-409.344
110.2	0.02253	-140.031	120.475	0.120732	-17.3125	60.95	-0.0368059	-85.9688	96.95	-0.0339308	-13.6875
110.225	0.02244	-65.8438	120.5	0.135919	-20.1875	60.975	-0.031521	-112.188	96.975	-0.0352769	-15.7188
110.25	0.02161	-69.6875	120.525	0.145323	-1.15625	61	-0.0252279	-162.375	97	-0.0350657	7.71875
110.275	0.02007	-116.438	120.55	0.148267	-43.2188	61.025	-0.0180947	-124.875	97.025	-0.0332765	33.875
110.3	0.01786	-123.062	120.575	0.144211	-3.96875	61.05	-0.0103184	-122.906	97.05	-0.0299611	44.5938
110.325	0.01506	-2.0625	120.6	0.132808	264.531	61.075	-0.00211934	-108.562	97.075	-0.0252462	60.5938
110.35	0.01177	-58.75	120.625	0.11397	-314.781	61.1	0.00626597	-154.656	97.1	-0.0193336	80.5
110.375	0.0081	-139.75	120.65	0.0879195	-21.9062	61.125	0.0145919	-122.594	97.125	-0.0124938	137.75
110.4	0.00419	-79.4688	120.675	0.0552363	-9.78125	61.15	0.0226117	-60.125	97.15	-0.0050537	175.094
110.425	0.000174354	126.188	120.7	0.0168818	18.8438	61.175	0.0300851	-106.594	97.175	0.0026219	111.656
110.45	-0.0038	-103.531	120.725	-0.0257978	78.75	61.2	0.0367863	-126.625	97.2	0.0101527	46.4062
110.475	-0.0076	-103.719	120.75	-0.0710988	56.8125	61.225	0.042511	-103.812	97.225	0.0171672	20.3438
110.5	-0.01107	-103	120.775	-0.117016	63.6875	61.25	0.0470833	-102.375	97.25	0.0233255	4.375
110.525	-0.0141	-21.3125	120.8	-0.161331	114.781	61.275	0.050361	-160	97.275	0.0283393	-25.5
110.55	-0.01656	16.2188	120.825	-0.201722	169.469	61.3	0.0522409	-158.812	97.3	0.0319879	-41.0938
110.575	-0.01838	-24	120.85	-0.2359	169.219	61.325	0.0526613	95.875	97.325	0.0341287	-11.625
110.6	-0.01948	-42.6562	120.875	-0.261748	132.312	61.35	0.0516045	-24.8438	97.35	0.0347029	4
110.625	-0.01983	61.6562	120.9	-0.277466	93.8125	61.375	0.0490976	-164.75	97.375	0.0337362	-14.5
110.65	-0.0194	112.781	120.925	-0.281704	26.9375	61.4	0.0452109	-155.438	97.4	0.0313337	-20.8125
110.675	-0.01822	50.75	120.95	-0.273666	-39.25	61.425	0.0400562	-78.875	97.425	0.02767	-2.4375
110.7	-0.01633	6.5625	120.975	-0.253194	-45.5	61.45	0.0337827	-88.0312	97.45	0.0229733	1.65625
110.725	-0.01379	-7.65625	121	-0.220801	-20.3125	61.475	0.0265728	-83.2188	97.475	0.0175074	-8.34375
110.75	-0.01071	-44.9375	121.025	-0.177671	9.65625	61.5	0.0186355	-99.5938	97.5	0.0115515	1.84375
110.775	-0.00721	-129.031	121.05	-0.125607	-12.9688	61.525	0.0102005	-56.7812	97.525	0.00538373	55.3125
110.8	-0.00342	-160.312	121.075	-0.066942	-37.25	61.55	0.00151052	26.0625	97.55	-0.000732515	-33.4375
110.825	0.000513148	-77.6875	121.1	-0.00441419	-8.65625	61.575	-0.007186	4.34375	97.575	-0.00655613	-53.7812
110.85	0.00442	-43.8438	121.125	0.0589894	5.25	61.6	-0.0156427	-23.4375	97.6	-0.0118712	-24.7812
110.875	0.00813	-102.5	121.15	0.120202	-33.5312	61.625	-0.0236225	-30.1875	97.625	-0.0164866	174.094
110.9	0.01149	-126.906	121.175	0.176253	-37.7188	61.65	-0.0309051	-45.5312	97.65	-0.0202339	-298.219
110.925	0.01435	-67.6562	121.2	0.224436	-9.21875	61.675	-0.0372929	-125.844	97.675	-0.0229671	-26.8125
110.95	0.01658	-53.6562	121.225	0.262462	11.2812	61.7	-0.0426171	-147.25	97.7	-0.0245649	-31.7188
110.975	0.01806	-96.375	121.25	0.28858	-14.4375	61.725	-0.0467422	-110.562	97.725	-0.0249382	6.78125
111	0.01874	-133.438	121.275	0.30167	-9.9375	61.75	-0.0495693	-117.719	97.75	-0.0240431	28.9688
111.025	0.01858	-55.6562	121.3	0.301289	-9.5625	61.775	-0.051039	-156.219	97.775	-0.0218959	24.0938
111.05	0.0176	-35.0625	121.325	0.287685	3.6875	61.8	-0.0511318	-132.094	97.8	-0.0185891	36.875
111.075	0.01586	-107.625	121.35	0.261758	-48.7812	61.825	-0.0498683	-92.625	97.825	-0.0143004	94.7812
111.1	0.01345	-109.375	121.375	0.224998	2.84375	61.85	-0.0473078	-96.125	97.85	-0.00929335	138.312
111.125	0.01051	-72.7812	121.4	0.179378	46.25	61.875	-0.0435453	-152.656	97.875	-0.00390577	129.781
111.15	0.00718	-61.6875	121.425	0.127232	-206.688	61.9	-0.0387081	-142.25	97.9	0.00147356	92.6562
111.175	0.00363	-142.531	121.45	0.0711199	-33.2812	61.925	-0.0329509	-141.969	97.925	0.00643766	40.0625
111.2	4.67436e-05	-10.3125	121.475	0.0136784	-16.625	61.95	-0.0264504	-82.8438	97.95	0.0105995	-5.71875
111.225	-0.00342	-60.6562	121.5	-0.042514	25.4062	61.975	-0.0193996	-120.844	97.975	0.0136305	-21.2188
111.25	-0.00661	-7.28125	121.525	-0.0950648	63.2812	62	-0.0120011	-172.281	98	0.0152945	-39.625
111.275	-0.00941	-112.656	121.55	-0.141875	46.6875	62.025	-0.00446088	-121.906	98.025	0.0154732	-8.5625
111.3	-0.01171	-101.156	121.575	-0.181221	53.5938	62.05	0.00301794	-82.1875	98.05	0.0141808	-9.6875
111.325	-0.01346	-53.4375	121.6	-0.211812	131.25	62.075	0.0102413	-125.906	98.075	0.0115655	-30.8125
111.35	-0.01461	-2.21875	121.625	-0.232821	165.594	62.1	0.0170295	-100.812	98.1	0.00789776	-36.7188
111.375	-0.01516	-65.625	121.65	-0.243878	157.469	62.125	0.0232221	-105.094	98.125	0.00354648	-11.9375
111.4	-0.01514	-50.75	121.675	-0.245051	116.719	62.15	0.0286816	-84.5938	98.15	-0.00105645	1.28125
111.425	-0.01459	47.3438	121.7	-0.236798	56.1875	62.175	0.0332967	-136.281	98.175	-0.00545898	-30.9375
111.45	-0.01356	110.531	121.725	-0.219904	30.6562	62.2	0.036984	-123.125	98.2	-0.00923493	-33.5312
111.475	-0.01213	30.6562	121.75	-0.195412	-40.5938	62.225	0.0396893	15.6562	98.225	-0.0120278	51.625
111.5	-0.01035	-61.0938	121.775	-0.164547	-53.0938	62.25	0.0413868	-0.09375	98.25	-0.0135863	45.2812
111.525	-0.0083	-69.6562	121.8	-0.128652	8.3125	62.275	0.0420786	-140.562	98.275	-0.0137874	-71.3438
111.55	-0.00606	-66	121.825	-0.0891211	6.15625	62.3	0.0417928	-146.875	98.3	-0.0126426	-46.375
111.575	-0.00367	-142.188	121.85	-0.0473572	-25.7188	62.325	0.0405804	-89.1875	98.325	-0.0102896	43.5625
111.6	-0.00122	-170.5	121.875	-0.00473075	-34.5938	62.35	0.0385126	-58.0312	98.35	-0.00696873	-101.469
111.625	0.00124	-102.469	121.9	0.0374439	4.3125	62.375	0.0356768	-58.5625	98.375	-0.00298957	-161.781
111.65	0.00364	-79.9062	121.925	0.0779245	8.28125	62.4	0.0321733	-75.7188	98.4	0.00130801	-63.7812
111.675	0.00592	-126.812	121.95	0.11555	-28.375	62.425	0.0281107	-11.8438	98.425	0.00559294	0.03125
111.7	0.00799	-160.625	121.975	0.149245	-35.3438	62.45	0.0236031	50.375	98.45	0.00957677	11.4688
111.725	0.00979	-75.4688	122	0.178028	-5.25	62.475	0.0187658	35.9375	98.475	0.0130375	11.5
111.75	0.01126	-39.625	122.025	0.201017	30.7812	62.5	0.0137129	28.5938	98.5	0.0158302	-6.875
111.775	0.01231	-113.781	122.05	0.217444	-49.125	62.525	0.00855438	35.1875	98.525	0.017883	77.9688
111.8	0.01291	-153.25	122.075	0.226674	-58.5625	62.55	0.00339395	-9.21875	98.55	0.0191832	134.062
111.825	0.013	-80.3125	122.1	0.228224	-33.2812	62.575	-0.00167235	-78.9062	98.575	0.0197544	109.781
111.85	0.01259	-54.9062	122.125	0.221796	-0.71875	62.6	-0.00655732	-119.531	98.6	0.0196349	121.031
111.875	0.01168	-101.031	122.15	0.207304	430.562	62.625	-0.0111832	-65.4062	98.625	0.0188583	108.281
111.9	0.0103	-111.031	122.175	0.184901	-467.469	62.65	-0.0154818	-65.7188	98.65	0.017442	31.7812
111.925	0.00852	-102.844	122.2	0.155005	-15.8438	62.675	-0.0193946	-88.9688	98.675	0.0153834	-24.6875
111.95	0.00644	-67.5625	122.225	0.118311	27.9375	62.7	-0.0228723	-92.625	98.7	0.0126637	-51.7188
111.975	0.00415	-121.75	122.25	0.0757959	4.90625	62.725	-0.0258746	-83.5312	98.725	0.00925742	-31.4375
112	0.00177	-15.75	122.275	0.0287126	3.15625	62.75	-0.0283693	-38.875	98.75	0.00514541	-3.75
112.025	-0.000586635	-76.7188	122.3	-0.0214373	72.3125	62.775	-0.030332	-108.812	98.775	0.000329862	-21.3438
112.05	-0.0028	-41.875	122.325	-0.0729403	97.2812	62.8	-0.0317459	-131.094	98.8	-0.00515111	-53.7188
112.075	-0.00477	-107.469	122.35	-0.123923	101.469	62.825	-0.0326009	-102.219	98.825	-0.0112102	2.21875
112.1	-0.0064	-129.25	122.375	-0.172413	113.719	62.85	-0.0328936	-54.0938	98.85	-0.0177002	-4.5625
112.125	-0.00765	-60.875	122.4	-0.216414	190.281	62.875	-0.0326271	-91.875	98.875	-0.0244086	-27.6562
112.15	-0.00845	-1.65625	122.425	-0.253976	183.062	62.9	-0.0318107	-126.719	98.9	-0.0310567	-58.625
112.175	-0.00881	-45.5312	122.45	-0.283278	100.781	62.925	-0.03046	-93.125	98.925	-0.0373088	-27.5
112.2	-0.00873	-62.0938	122.475	-0.302706	-21.0312	62.95	-0.0285965	-36.5312	98.95	-0.0427877	36.625
112.225	-0.00822	64.5312	122.5	-0.310924	-15.1562	62.975	-0.0262482	-67.4688	98.975	-0.0470996	32.3438
112.25	-0.00735	116.594	122.525	-0.30695	11.0938	63	-0.0234488	-70.2188	99	-0.0498638	-69.5
112.275	-0.00618	63.5938	122.55	-0.29021	4.34375	63.025	-0.0202385	-37.4375	99.025	-0.0507454	-43.1875
112.3	-0.00476	-63.0312	122.575	-0.260598	-35.2812	63.05	-0.016663	-89.6562	99.05	-0.049486	27.7188
112.325	-0.00318	-75.0312	122.6	-0.218505	39.9062	63.075	-0.0127742	-108.5	99.075	-0.0459303	-24.5625
112.35	-0.00153	-55.4375	122.625	-0.164841	46.0312	63.1	-0.00862959	-121.156	99.1	-0.0400458	-214.938
112.375	0.000126199	-130.219	122.65	-0.101031	-6.25	63.125	-0.00429208	232.594	99.125	-0.031934	-29.5625
112.4	0.00169	-163.781	122.675	-0.0289947	3.40625	63.15	0.000170328	-196.406	99.15	-0.0218323	0.6875
112.425	0.0031	-106.625	122.7	0.0489078	18.5625	63.175	0.00468502	-97.6875	99.175	-0.0101071	4.625
112.45	0.00428	-38.9375	122.725	0.129946	14.4688	63.2	0.00917537	-128.344	99.2	0.00276297	13.4688
112.475	0.00518	-82.0625	122.75	0.21112	-12.5312	63.225	0.0135616	-67.7188	99.225	0.0162117	43.0938
112.5	0.00573	-154.25	122.775	0.289279	-4.96875	63.25	0.0177617	-51.75	99.25	0.0296169	85.4062
112.525	0.00592	-94.4375	122.8	0.361256	23.8438	63.275	0.0216929	-54.5938	99.275	0.0423361	98.9688
112.55	0.00572	-62.6875	122.825	0.424021	41.2188	63.3	0.0252729	-67.3125	99.3	0.053743	101
112.575	0.00513	-86.6562	122.85	0.474827	-33.1562	63.325	0.0284219	-16.7188	99.325	0.0632641	145.875
112.6	0.00418	-162.031	122.875	0.511353	-78	63.35	0.0310645	84.7812	99.35	0.0704111	112.5
112.625	0.00289	-103.719	122.9	0.531836	-20.4688	63.375	0.0331318	61.25	99.375	0.0748096	12.7188
112.65	0.00133	-80.4688	122.925	0.53517	484.031	63.4	0.0345638	22.9062	99.4	0.0762213	-45.9688
112.675	-0.000418288	-114.375	122.95	0.520983	-503.719	63.425	0.0353114	-11.3438	99.425	0.074559	-29.75
112.7	-0.00227	-113.125	122.975	0.489665	-73.3125	63.45	0.0353389	-27.9688	99.45	0.0698933	-21.4062
112.725	-0.00411	-85.7812	123	0.442364	10.7188	63.475	0.0346252	-93	99.475	0.0624493	-44.5625
112.75	-0.00584	-73.2188	123.025	0.380932	53	63.5	0.033166	-111.781	99.5	0.0525946	-39.5938
112.775	-0.00735	-124.438	123.05	0.30784	19.8125	63.525	0.0309741	-127.906	99.525	0.0408181	-24.3438
112.8	-0.00854	-115.344	123.075	0.226046	5.53125	63.55	0.02808	-55.8438	99.55	0.0277008	-27.5312
112.825	-0.00934	93.1562	123.1	0.138842	89.5938	63.575	0.0245318	-83.4375	99.575	0.0138818	-32.4062
112.85	-0.00969	-57.5312	123.125	0.049682	117.094	63.6	0.0203934	-109.562	99.6	2.00657e-05	-57.9062
112.875	-0.00957	-91.1875	123.15	-0.0380057	108.656	63.625	0.0157434	-77.4688	99.625	-0.0132436	-26.8438
112.9	-0.00897	-128.188	123.175	-0.120993	132.781	63.65	0.0106727	-87.1875	99.65	-0.0253224	-16.625
112.925	-0.00793	-58.9062	123.2	-0.196418	183.406	63.675	0.00528084	-94.5312	99.675	-0.0357147	13.125
112.95	-0.00651	5.90625	123.225	-0.261918	153.719	63.7	-0.000326439	-146.062	99.7	-0.0440293	1.6875
112.975	-0.00479	-29.6562	123.25	-0.31574	19.4062	63.725	-0.00604137	-65.2188	99.725	-0.0500014	-68.125
113	-0.00285	-76.25	123.275	-0.356798	-18.9062	63.75	-0.0117576	-46.125	99.75	-0.0535011	-39.1875
113.025	-0.000806244	50	123.3	-0.3847	0.9375	63.775	-0.0173737	-90.5625	99.775	-0.0545314	17.3438
113.05	0.00125	135.094	123.325	-0.399721	21.375	63.8	-0.0227966	-101.062	99.8	-0.0532193	-353.5
113.075	0.00324	105.719	123.35	-0.402749	-23.25	63.825	-0.0279442	-86.625	99.825	-0.0498	-184.281
113.1	0.00507	-10.7188	123.375	-0.395186	7.3125	63.85	-0.0327478	-17.75	99.85	-0.0445977	-17.625
113.125	0.0067	-62.625	123.4	-0.378826	6.53125	63.875	-0.0371534	-100.031	99.875	-0.0380029	-6.6875
113.15	0.00809	-24.5	123.425	-0.35572	12.2812	63.9	-0.0411234	-152.469	99.9	-0.0304486	-27.5938
113.175	0.00923	-74	123.45	-0.328026	-15.3438	63.925	-0.0446357	-118.469	99.925	-0.0223843	11.5312
113.2	0.01012	-151.875	123.475	-0.29787	-43.0938	63.95	-0.0476843	-82.4688	99.95	-0.0142485	44.4062
113.225	0.01078	-98.4688	123.5	-0.26721	-21.1875	63.975	-0.0502773	146.5	99.975	-0.00644215	36.5
